# Supplementary material for: Novel pipeline identifies new upstream ORFs and non-AUG initiating main ORFs with conserved amino acid sequences in the 5′ leader of mRNAs in Arabidopsis thaliana
Source: PubMed Central journal article supplement — RNA. 2019 Mar;25(3):292–304. doi: 10.1261/rna.067983.118 (PMC6380273; doi:10.1261/rna.067983.118), 2019-03

# AT4G00840

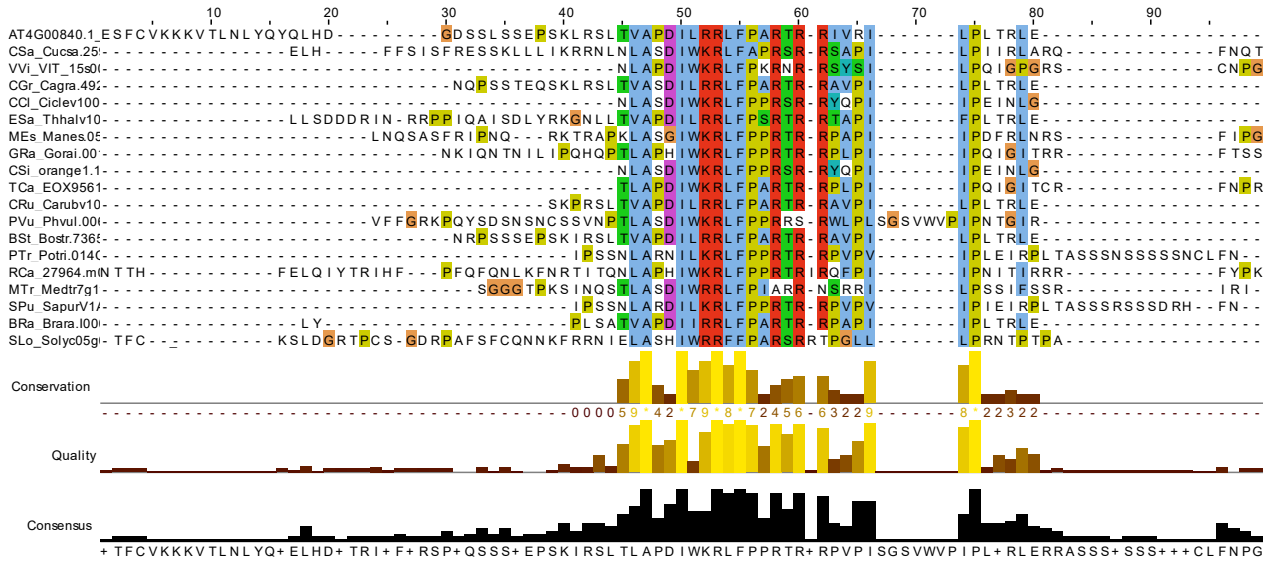

# AT4G21326

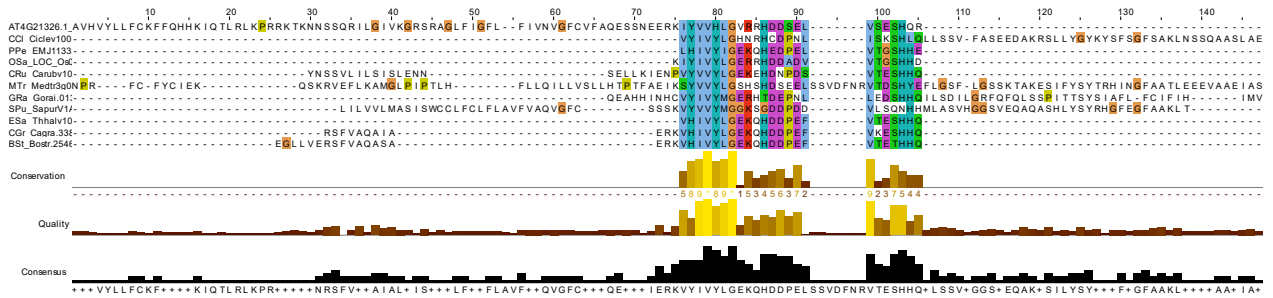

# AT5G13330

AT5G13330.1 --- FLSKSC TY- IHTHLLF SWCVCLH --- IRVSTYF VVKVD- RRYGKGPVPEET AAA- --- DDNSWNE TDVTA- ---  
 ALy fgenes2 --- FLSKSC TY- IHTHLLF SWCVCLH --- IQFVVKVD- RRYGKGPVPEET AAA- --- DENPSWNE TDVNA- ---  
 BRa Brara.C0c --- FLSKSC TY- IHTHLLF SWCVCLH --- IVVKVD- RRYGKGLVPEET AAA- --- ENPSWNE TDVTA- ---  
 BSt Bostr.290c --- FLSKSC TY- IHTHLLF SWCVCLH --- FVVKVD- RRYGKGPVPEET AAAA- --- DDNPSWNE TDVTA- ---  
 TCa EOY0295 --- FLSKSC TY- IHTHLLF SWCVCLH --- LSCGFRGLDKVD- RRHGKRLPLDASEEK- KED- --- DIFSLYSS- FGLVQQG TSS- ---  
 ESa Thhalv10SNLVL FKVFIY- IHTLLVFLCVCVCACVTVLSCGFRGLDKVD- RRYGKGLVPEET AAA- --- ENPTWNE TDVTA- ---  
 ACo Aquca 0r --- YGIIIT- YLCTHISRKFKALVD- RRHGKRLPLDASEEKEK- --- KQODN- ---  
 GRa Gorai.00f --- YGIIIT- YLCTHISRKFKALVD- RRHGKRLPLDASEEKEK- --- DEFAAAA TSWTESAD- ---  
 VVi\_VIT\_01s0 --- YGIIIT- YLCTHISRKFKALVD- RRHGKRLPLDASEEKEK- --- YSDDQQWVTHHQD- ---  
 GMa Glyma.1l --- IDNNEE FIELNKKVD- RRHGKRLPLDASEEKEK- --- FNFSVNQS PPKSGGGEASQF- SF  
 SPu SapurV1f --- NOKSECQLLFLKVD- RGYGKRLPLDASEEKEK- --- HGFPSYSS TSWTESAD- ---  
 MEs Manes.08 --- DYLLYNNYSYKVD- RRHGKRLPLDASEEKEK- --- DDFPSYSS TSWTESAD- ---  
 MGu Migut.K0c --- RYKFKKKDKSKVD- RRHGKRLPLDASEEKEK- ---  
 CRu Carubv10 --- VVVD- RRYGKGPVPEET AAAA- --- DDNPSWNE TDVTA- ---  
 PTr Potri.001c --- CHRPKTKRFS INCLFVKVD- RRYGKRLPLDASEEKEK- --- DDFPSYSS TSWTESAD- ---  
 MTr Medtr7g0 --- KRKSNLKKVD- RRYGKRLPLDASEEKEEYALVNNFEDAYNYAASNINWC PTDLS T  
 LJa L1q3v39c --- LSKVD- RRHGKRLPLDQASGDKRED- --- LYFVQVPSKSGGGEASLW- LF  
 EGr\_Eucgr.B0c --- LRLSSSKVD- RRHGKRLPLDASEEKEK- --- DDFASYESSLSETEVSA- ---

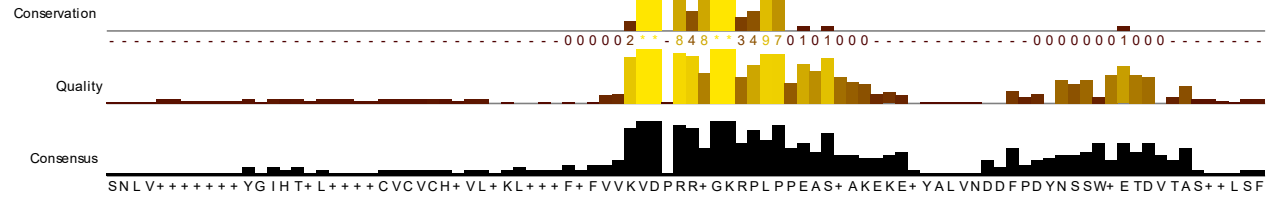

### AT5G18260

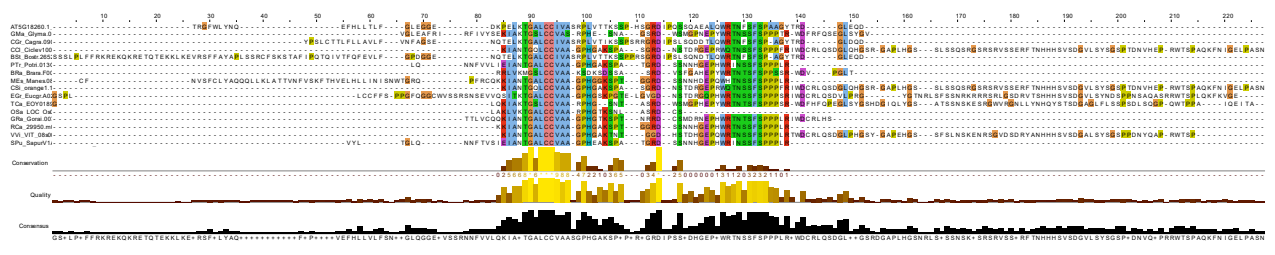

### AT5G18280

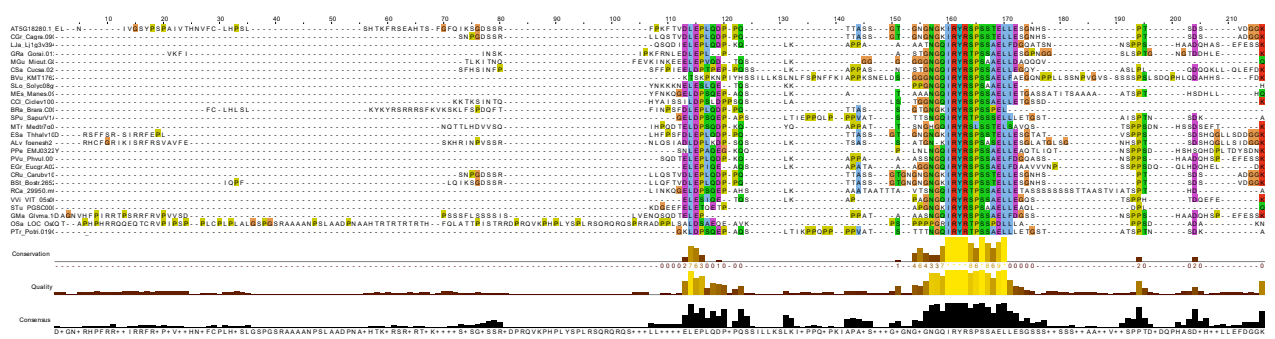

### AT5G36250

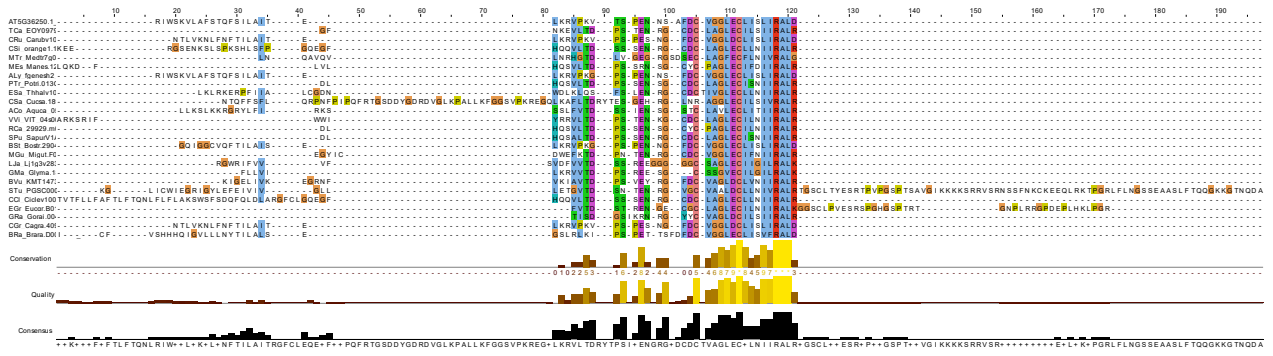

Supplement: supp_067983.118_Supplemental_Figure_S3.pdf [file supp_067983.118_Supplemental_Figure_S3.pdf]
