# Supplementary material for: Novel pipeline identifies new upstream ORFs and non-AUG initiating main ORFs with conserved amino acid sequences in the 5′ leader of mRNAs in Arabidopsis thaliana
Source: PubMed Central journal article supplement — RNA. 2019 Mar;25(3):292–304. doi: 10.1261/rna.067983.118 (PMC6380273; doi:10.1261/rna.067983.118), 2019-03

# AT1G01060

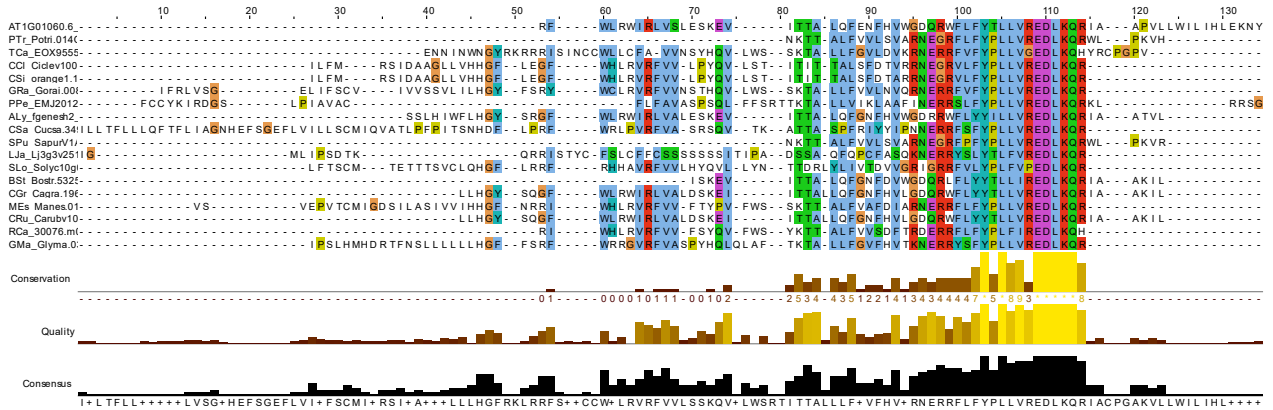

# AT1G07640

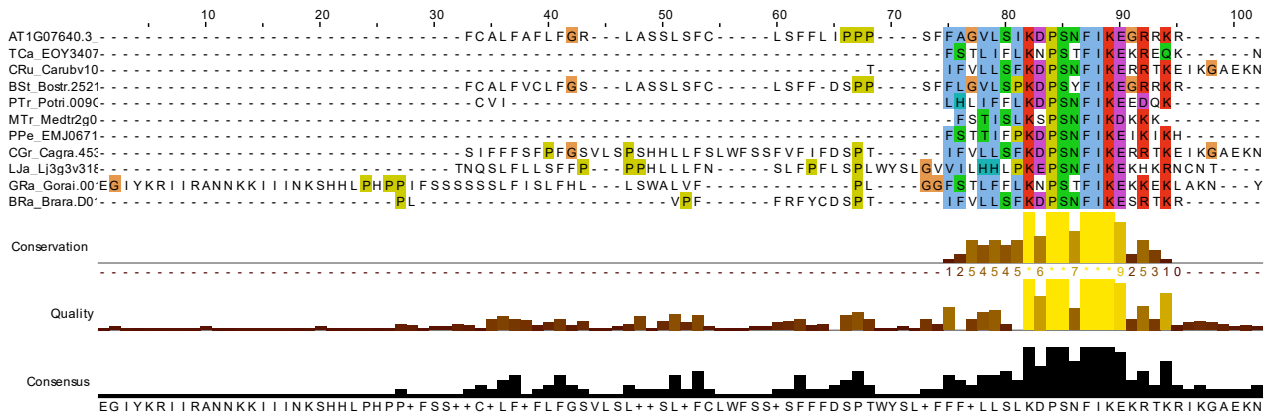

# AT1G14560

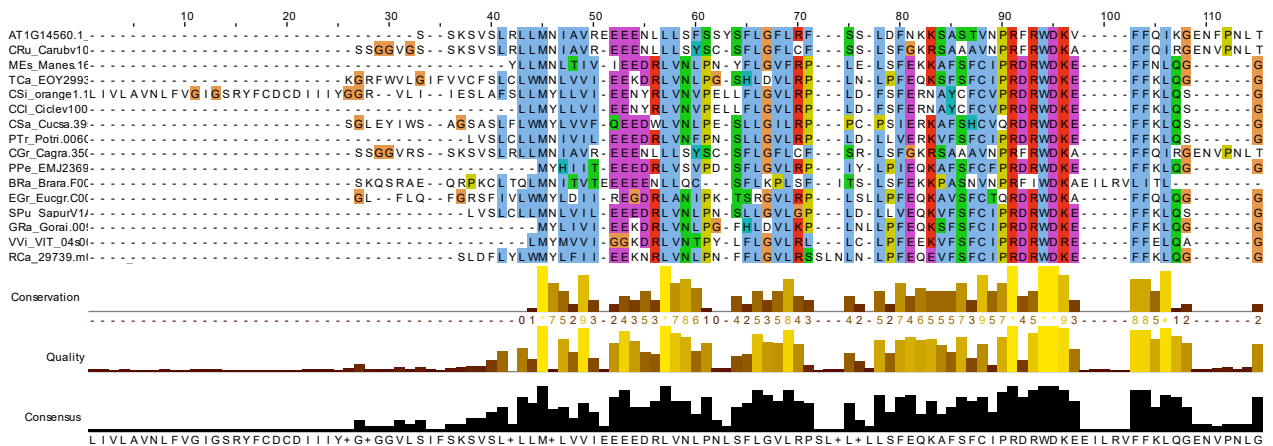

# AT1G62400

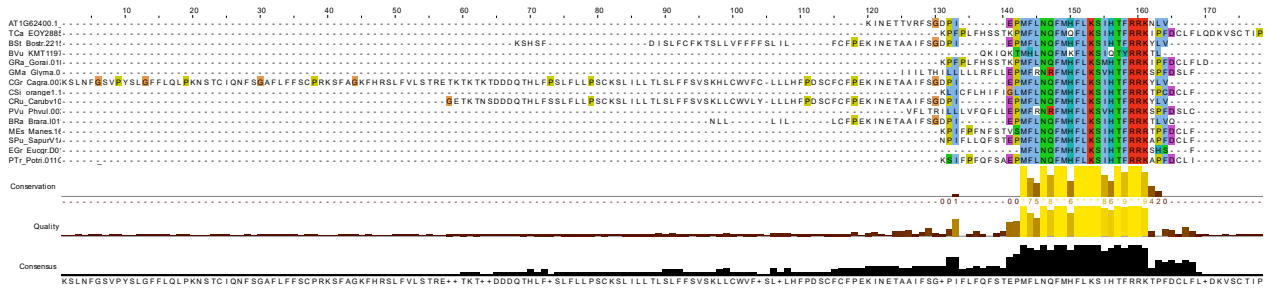

## AT1G66540

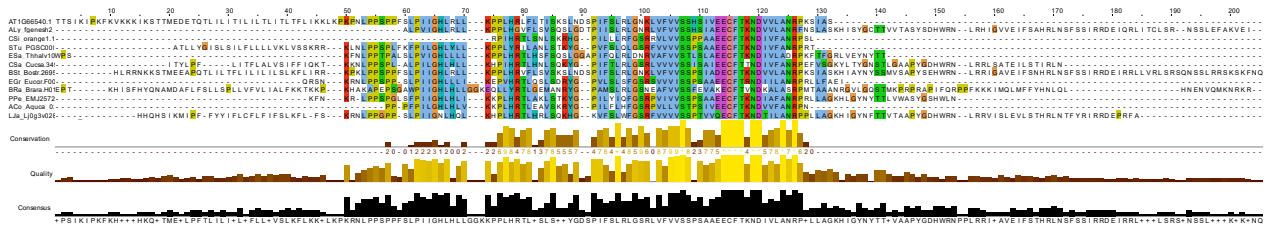

## AT1G68100

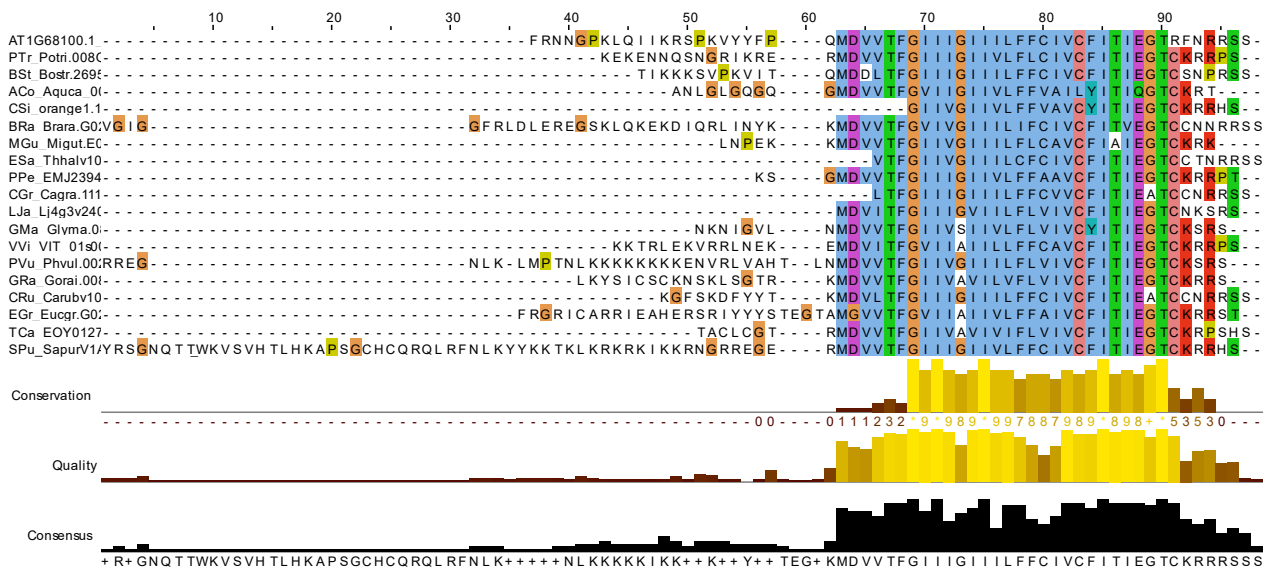

## AT1G68920

10 20 30 40 50

AT1G68920.2 SLNTL AMAVFMFNDQKALFFMQAWV  
 ACo\_Aquca\_01 YFTVAVAVVNHSMALFLMQAWV  
 CGr\_Cagra.11f CLDTL AMAVFMFNDQKALFFMQAWV  
 CRu\_Carubv10 CLDTL AMAVFMFNDQKALFFMQAWL KNREKGVLLSDSKDPVQ  
 GRa\_Gorai.01:TRVSKSFEVLKEERRRVFCN ILTVAVAVVNDQTALFLMQAWV  
 BRa\_Bra.80 AVFMFNDQKALIFMQAWV  
 BVu\_KMT087 CLNTL AMAVFMFNDQKALFFMQAWV  
 ALy\_fgensch2 CLNTL AMAVFMFNDQKALFFMQAWV  
 MEs\_Manes.14 RWL I I KALFLMQAWV  
 TCa\_EOY0154 RKRRGLFCN ILAVAVAVVNDQKALFLMQAWV  
 CCI\_Ciclev100 QKALFFMQAWV

Conservation

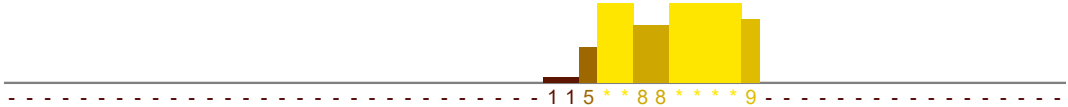

Quality

Consensus

TRVSKSFEVLK++RR++CLNTLAMAVFMFNDQKALFFMQAWVKNREKGVLLSDSKDPVQ

### AT1G72820

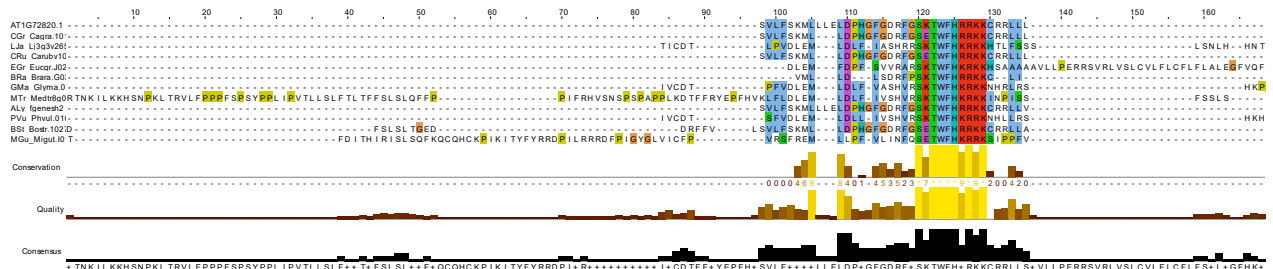

### AT1G77840

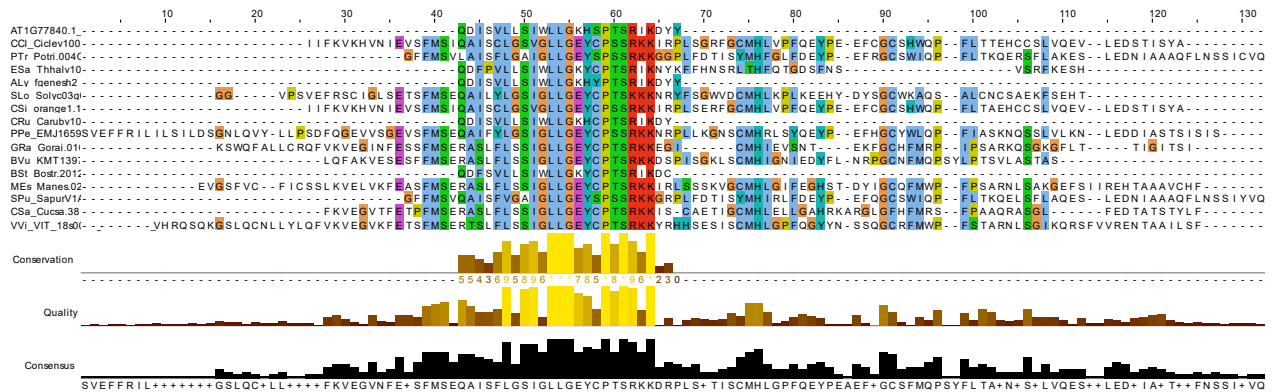

### AT2G23570

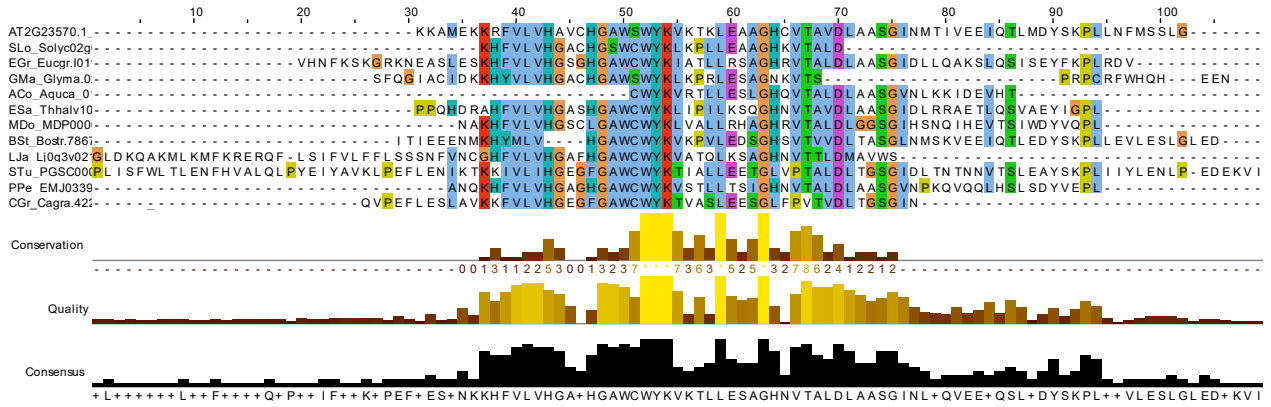

### AT2G29290

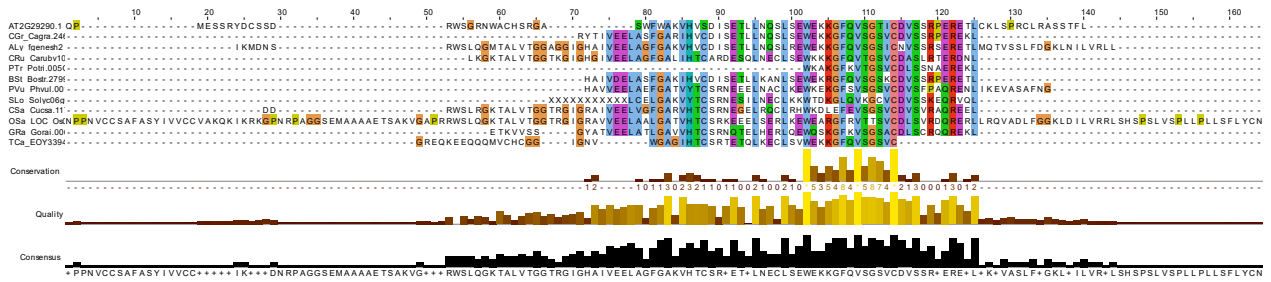

### AT3G08730

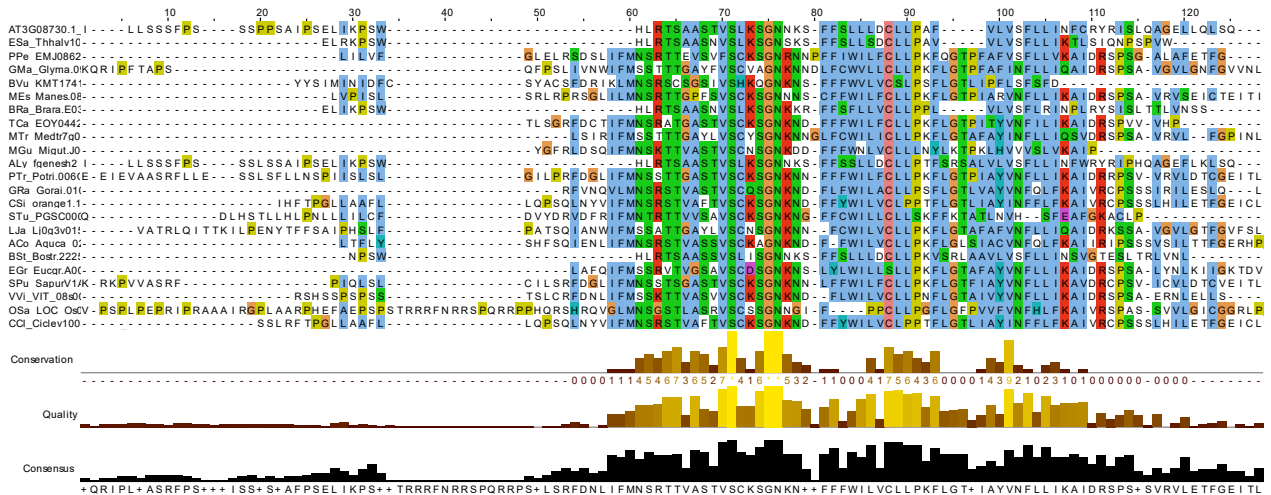

### AT3G08850

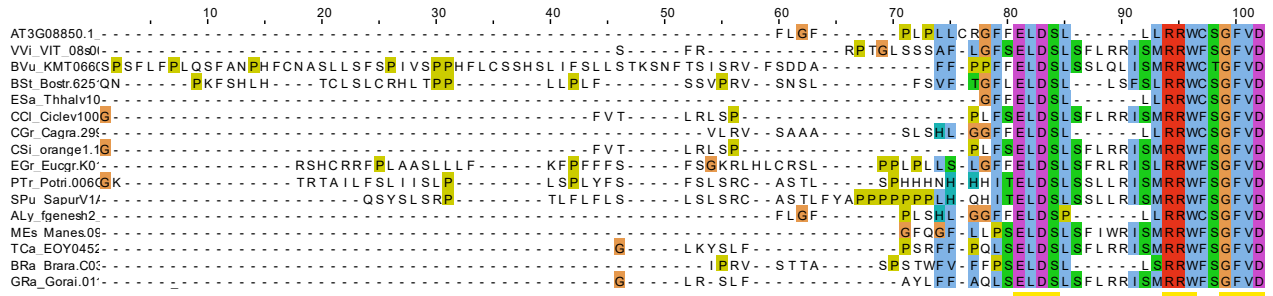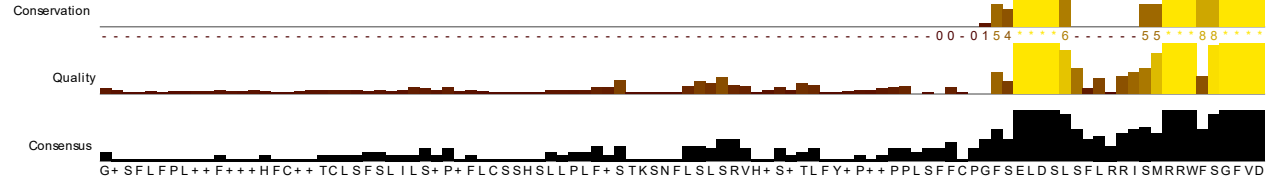

### AT3G23010

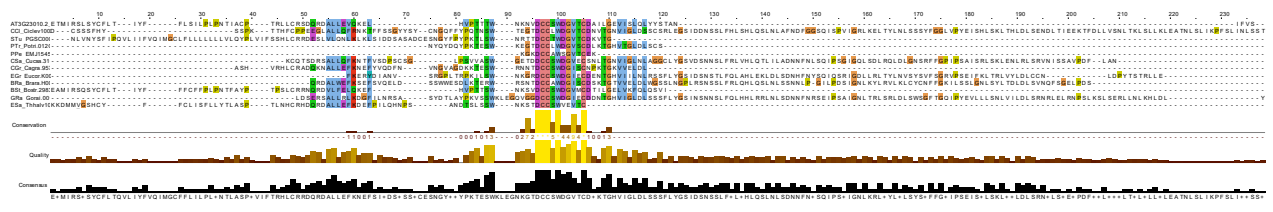

### AT3G25890

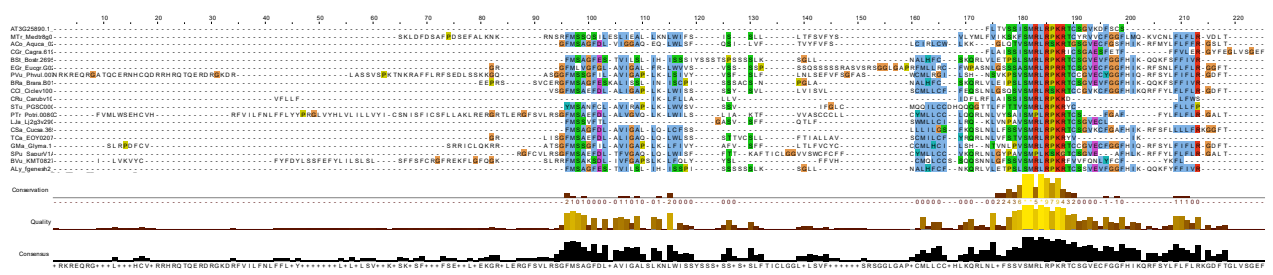

### AT3G49430

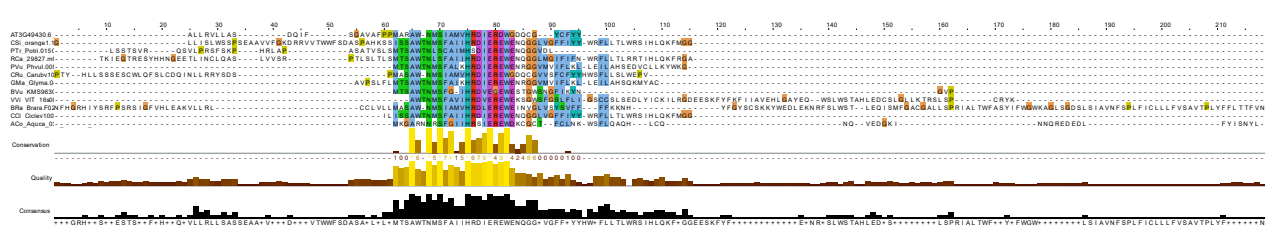

### AT3G62040

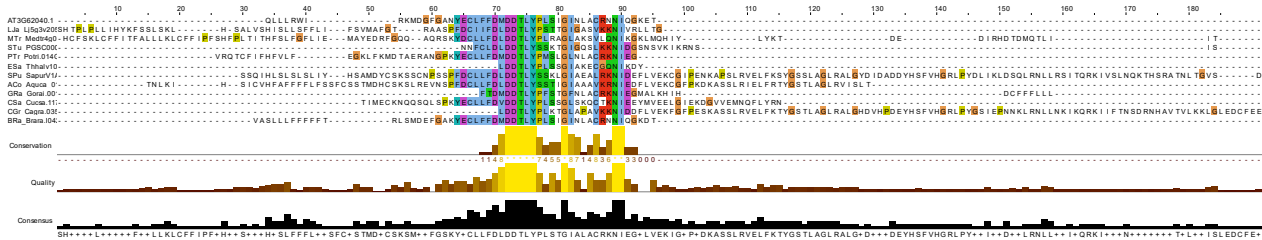

AT4G03260

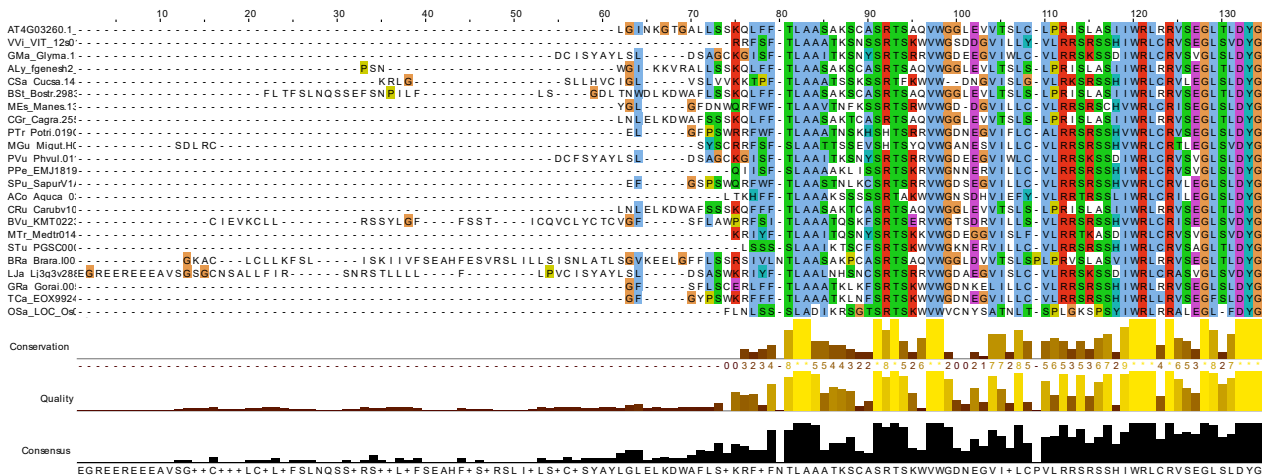

AT4G15180

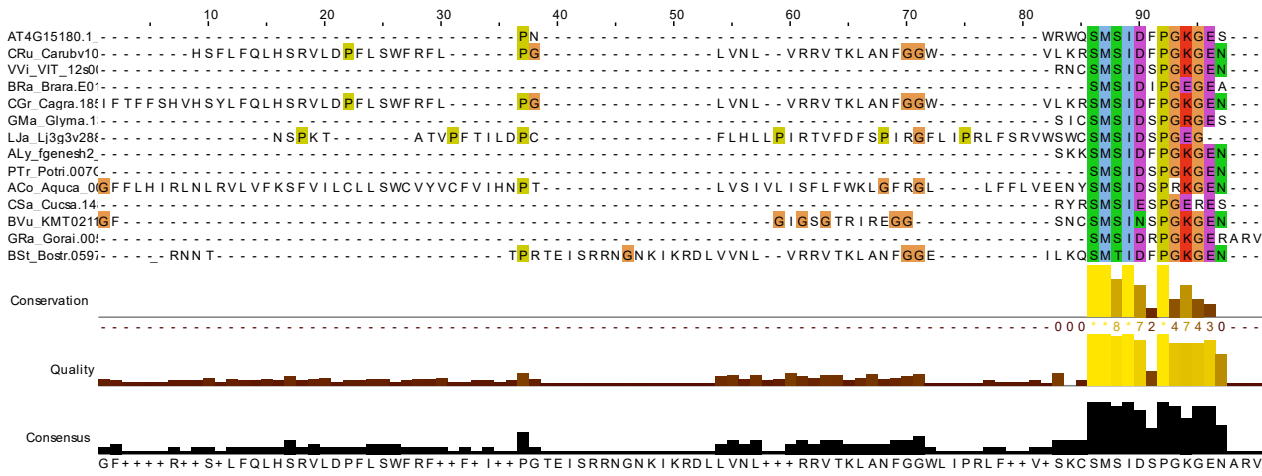

AT4G17980

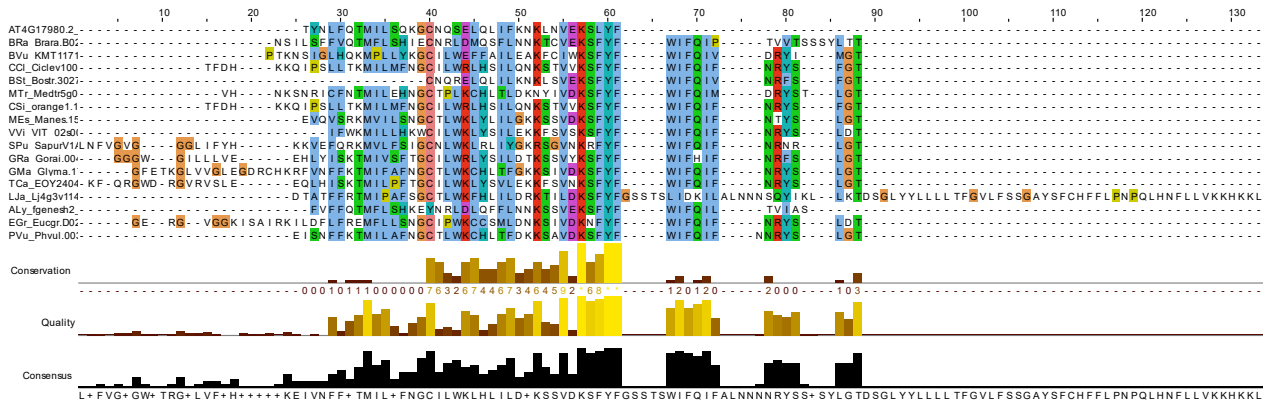

### AT5G14720

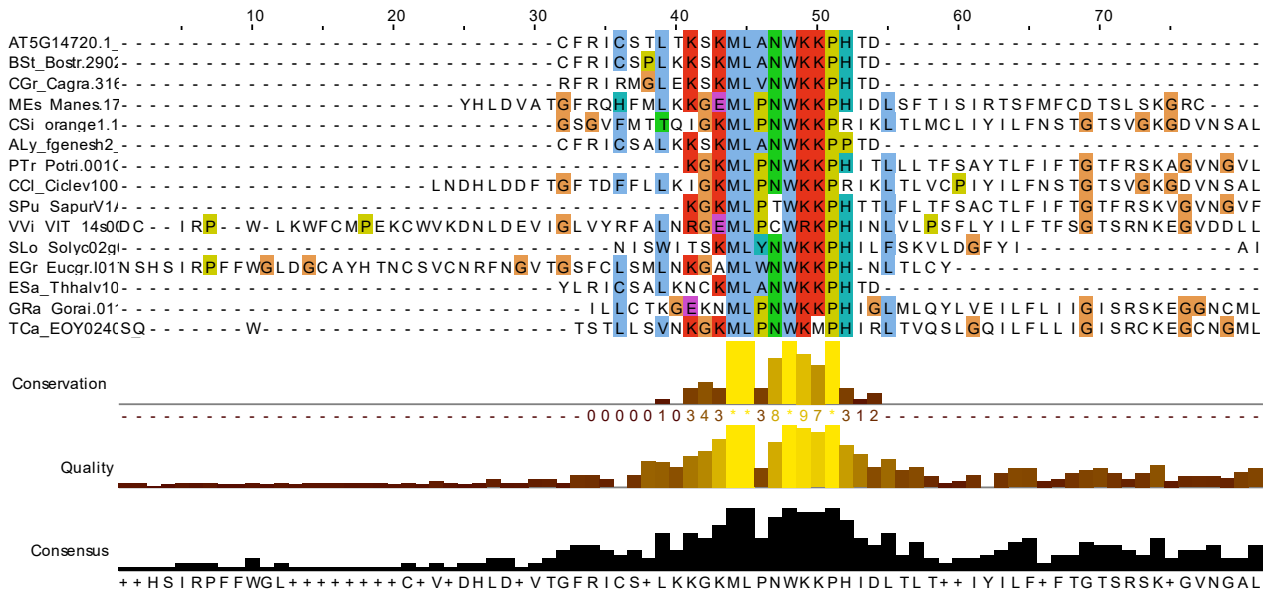

### AT5G26140

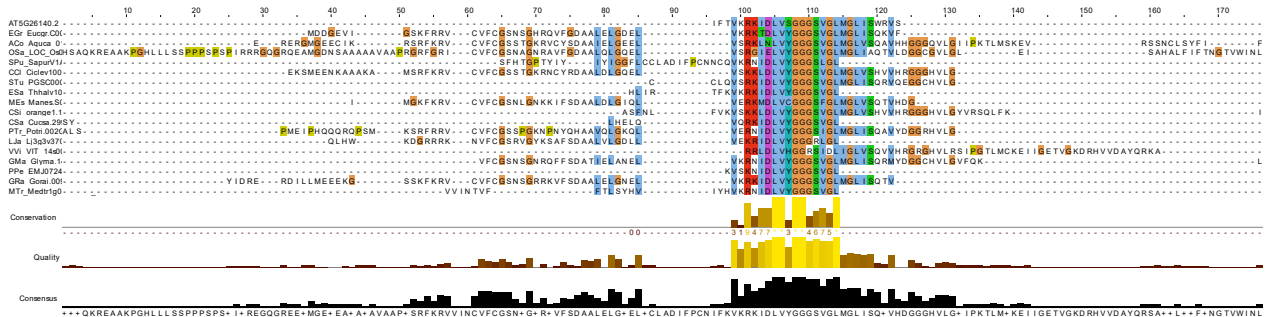

### AT5G35715

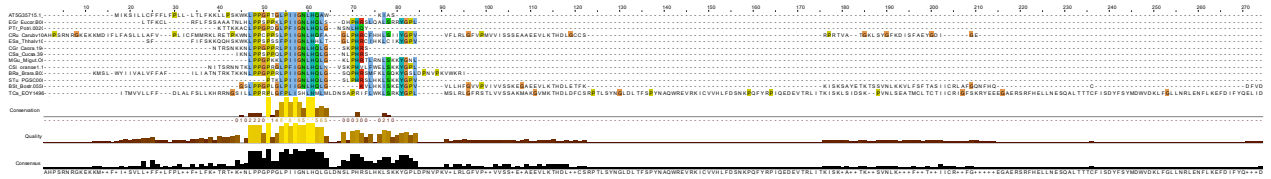

### AT5G55100

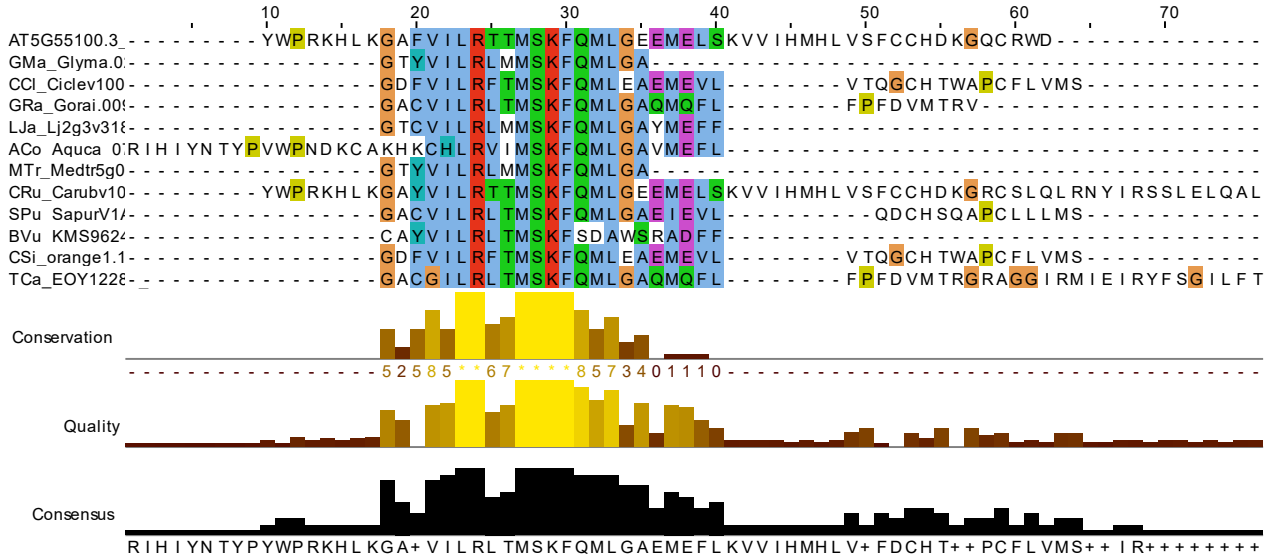

### AT5G63190

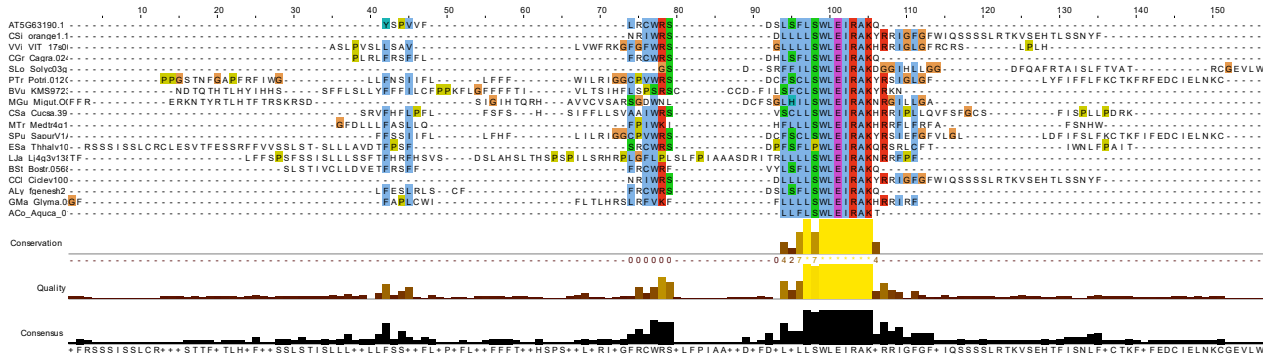

Supplement: supp_067983.118_Supplemental_Figure_S4.pdf [file supp_067983.118_Supplemental_Figure_S4.pdf]
