# Supplementary material for: Novel pipeline identifies new upstream ORFs and non-AUG initiating main ORFs with conserved amino acid sequences in the 5′ leader of mRNAs in Arabidopsis thaliana
Source: PubMed Central journal article supplement — RNA. 2019 Mar;25(3):292–304. doi: 10.1261/rna.067983.118 (PMC6380273; doi:10.1261/rna.067983.118), 2019-03
Supplement: supp_067983.118_Supplemental_Figure_S6.pdf [file supp_067983.118_Supplemental_Figure_S6.pdf]

|                                               |     | 10             | 20              | 30                 | 40              | 50         |
|-----------------------------------------------|-----|----------------|-----------------|--------------------|-----------------|------------|
| <i>AT1G01060.3_9/1-48</i>                     | TA  | LQFENFHVWGD    | QRWFLFYTLLVREDL | KQR                | -----IAAPVLLWIL | IHLEKNY    |
| <i>ALy_fgenesh2_kg.1_131_AT1G01060.3_9/1-</i> | TA  | LQFGNFHVWGD    | RRWFLYYILLVREDL | KQR                | -----IAATVLLWIL | IYLEKNY    |
| <i>BSt_Bostr.5325s0026.1_12/1-48</i>          | TA  | LQFGNFDVWGD    | QRLFLYYTLLIREDL | KQR                | -----IAAKILLWII | IHLEKNY    |
| <i>CGr_Cagra.1968s0051.2_8/1-49</i>           | TAL | LQFGNFHVLGD    | QRWFLYYTLLVREDL | KQR                | -----IAAKILLWIL | IHLEKNY    |
| <i>CRu_Carubv10008551m_12/1-49</i>            | TAL | LQFGNFHVLGD    | QRWFLYYTLLVREDL | KQR                | -----IAAKILLWIL | IHLEKNY    |
| <i>RCa_30076.m004464_12/1-30</i>              | TA  | -LFVVSDFTRD    | ERRFLFYPLFIREDL | KQH                | -----           |            |
| <i>MES_Manes.01G239000.2_15/1-30</i>          | TA  | -LFVAFDIARN    | ERRFLFYPLLREDL  | KQR                | -----           |            |
| <i>GRa_Gorai.008G132000.2_34/1-31</i>         | TA  | LLFVVLNVQRN    | ERRFVFYPLLREDL  | KQR                | -----           |            |
| <i>GMa_Glyma.03G261800.4_10/1-31</i>          | TA  | LLFGVFHVTKN    | ERRYSFYPLLREDL  | KQR                | -----           |            |
| <i>PVu_PhvuL.009G259600.2_11/1-47</i>         | TA  | LPFAVFHVTKN    | ERRYSFYPLLREDL  | KQR                | -HTSSNGRLLW-    | -RRSGY     |
| <i>Ptr_Potri.014G106800.10_19/1-36</i>        | TA  | -LFVVL SVARN   | EGRFLFYPLLREDL  | KQR                | -----           | -W- -LPKVH |
| <i>SPu_SapurV1A.0162s0390.6_11/1-36</i>       | TA  | -LFVVL SVARN   | EGRFPFYPLLREDL  | KQR                | -----           | -W- -LPKVR |
| <i>TCa_EOX95555_33/1-50</i>                   | TA  | LLFGVLDVQRN    | ERRFVFYPLLGEDL  | KQHYRCPGPVNGHILLW- | -RRTRY          |            |
| <i>CSa_Cucsa.349800.2_15/1-31</i>             | TA  | SPFR IYI PNN   | ERRSFYPLLREDL   | KQR                | -----           |            |
| <i>CCI_Ciclev10018963m_12/1-29</i>            | TA  | LSFDT - - VRRN | EGRVLFYPLLREDL  | KQR                | -----           |            |
| <i>CSI_orange1.1g004257m_12/1-29</i>          | TA  | LSFDT - - ARRN | EGRVLFYPLLREDL  | KQR                | -----           |            |
| <i>PPe_EMJ20128_33/1-49</i>                   | TA  | LLVIKLAAFIN    | ERRSLFYPLLREDL  | KQR                | -KLRRSNGHTV IW- | -RRFGH     |
| <i>LJa_Lj3g3v2518940.3_8/1-31</i>             | SA  | QFQPCFASQKN    | ERRYSLYTLFVREDL | KQR                | -----           |            |
| <i>SLo_Solyc10g005080.2.1_13/1-33</i>         | TDR | LYLIVT DVVGR I | GRRFVLYPLFVPEDL | KQR                | -----           |            |
