# Supplementary material for: Novel pipeline identifies new upstream ORFs and non-AUG initiating main ORFs with conserved amino acid sequences in the 5′ leader of mRNAs in Arabidopsis thaliana
Source: PubMed Central journal article supplement — RNA. 2019 Mar;25(3):292–304. doi: 10.1261/rna.067983.118 (PMC6380273; doi:10.1261/rna.067983.118), 2019-03
Supplement: supp_067983.118_Supplemental_Table_S1.pdf [file supp_067983.118_Supplemental_Table_S1.pdf]

| Filtering step                               | Stop to stop region |                                                     |                    | Stop to mORF start region |                                                     |                    | Total   |                                                     |                    |
|----------------------------------------------|---------------------|-----------------------------------------------------|--------------------|---------------------------|-----------------------------------------------------|--------------------|---------|-----------------------------------------------------|--------------------|
|                                              | SSR                 | Total transcripts<br>(including splice<br>variants) | Remaining<br>genes | SSR                       | Total transcripts<br>(including splice<br>variants) | Remaining<br>genes | SSR     | Total transcripts<br>(including splice<br>variants) | Remaining<br>genes |
| BLASTp                                       | 203,488             | 35,415                                              | 20,159             | 60,034                    | 35,294                                              | 19,890             | 263,522 | 39,650                                              | 22,118             |
| Homologous mORFs                             | 81,071              | 22,834                                              | 12,571             | 31,224                    | 20,536                                              | 12,134             | 112,295 | 27,768                                              | 15,345             |
| Alternative splicing and overlapping genes   | 73,437              | 21,568                                              | 11,923             | 27,406                    | 18,080                                              | 11,158             | 100,843 | 25,903                                              | 14,496             |
| Hit in at least one brassicales and 1 malvid | 1,009               | 703                                                 | 417                | 298                       | 256                                                 | 170                | 1,307   | 883                                                 | 535                |
| Purifying selection                          | 293                 | 267                                                 | 153                | 123                       | 122                                                 | 75                 | 416     | 373                                                 | 213                |
| Regional cons and 10+ species                | 158                 | 151                                                 | 89                 | 52                        | 52                                                  | 31                 | 210     | 201                                                 | 116                |
