# Supplementary material for: Novel pipeline identifies new upstream ORFs and non-AUG initiating main ORFs with conserved amino acid sequences in the 5′ leader of mRNAs in Arabidopsis thaliana
Source: PubMed Central journal article supplement — RNA. 2019 Mar;25(3):292–304. doi: 10.1261/rna.067983.118 (PMC6380273; doi:10.1261/rna.067983.118), 2019-03
Supplement: supp_067983.118_Supplemental_Table_S2.pdf [file supp_067983.118_Supplemental_Table_S2.pdf]

| group code | species code | species                         | common name          | classification                                  | genome version              | source       | transcript version | Source website                                                                                                              |
|------------|--------------|---------------------------------|----------------------|-------------------------------------------------|-----------------------------|--------------|--------------------|-----------------------------------------------------------------------------------------------------------------------------|
| EUD        | Aco          | Aquilegia coerulea              | columbine            | Eudicotyledons (Ranunculales)                   | JGI v1                      | Phytozome 11 | JGI v1.1           | <a href="https://phytozome.jgi.doe.gov/pz/portal.html">https://phytozome.jgi.doe.gov/pz/portal.html</a>                     |
| BRA        | Aly          | Arabisopsis lyrata              | lyrate rockcress     | Eudicotyledons (Rosids – Malvids – Brassicales) | JGI v1                      | Phytozome 11 | JGI V1.0           | <a href="https://phytozome.jgi.doe.gov/pz/portal.html">https://phytozome.jgi.doe.gov/pz/portal.html</a>                     |
| BRA        | Ath          | Arabidopsis thaliana (Columbia) | thale cress          | Eudicotyledons (Rosids – Malvids – Brassicales) | TAIR10                      | Araport      | Araport11          | <a href="https://araport.org">https://araport.org</a>                                                                       |
| EUD        | Bvu          | Beta vulgaris                   | sugar beet           | Eudicotyledons (Caryophyllales)                 | RefBeet-1.2.2               | Ensembl      | RefBeet-1.2.2      | <a href="https://plants.ensembl.org/info/website/ftp/index.html">https://plants.ensembl.org/info/website/ftp/index.html</a> |
| BRA        | Bst          | Boechera stricta                | drummond's rockcress | Eudicotyledons (Rosids – Malvids – Brassicales) | JGI v1                      | Phytozome 10 | JGI v1.3           | <a href="https://phytozome.jgi.doe.gov/pz/portal.html">https://phytozome.jgi.doe.gov/pz/portal.html</a>                     |
| BRA        | Bra          | Brassica rapa                   | turnip mustard       | Eudicotyledons (Rosids – Malvids – Brassicales) | JGI v1                      | Phytozome 10 | JGI v1.2           | <a href="https://phytozome.jgi.doe.gov/pz/portal.html">https://phytozome.jgi.doe.gov/pz/portal.html</a>                     |
| BRA        | Cgr          | Capsella grandiflora            |                      | Eudicotyledons (Rosids – Malvids – Brassicales) | JGI v1                      | Phytozome 10 | JGI v1.1           | <a href="https://phytozome.jgi.doe.gov/pz/portal.html">https://phytozome.jgi.doe.gov/pz/portal.html</a>                     |
| BRA        | Cru          | Capsella rubella                | red shepherd's purse | Eudicotyledons (Rosids – Malvids – Brassicales) | JGI v1                      | Phytozome 10 | ASGPB v0.4         | <a href="https://phytozome.jgi.doe.gov/pz/portal.html">https://phytozome.jgi.doe.gov/pz/portal.html</a>                     |
| BRA        | Cpa          | Carica papaya                   | papaya               | Eudicotyledons (Rosids – Malvids - Brassicales) | JGI v1                      | Phytozome 11 | JGI v1.0           | <a href="https://phytozome.jgi.doe.gov/pz/portal.html">https://phytozome.jgi.doe.gov/pz/portal.html</a>                     |
| MAL        | Ccl          | Citrus clementina               | clementine           | Eudicotyledons (Rosids – Malvids - Sapindales)  | JGI v1                      | Phytozome 10 | JGI v1.1           | <a href="https://phytozome.jgi.doe.gov/pz/portal.html">https://phytozome.jgi.doe.gov/pz/portal.html</a>                     |
| MAL        | Csi          | Citrus sisensis                 | orange               | Eudicotyledons (Rosids – Malvids - Sapindales)  | JGI v1                      | Phytozome 10 | JGI v1.1           | <a href="https://phytozome.jgi.doe.gov/pz/portal.html">https://phytozome.jgi.doe.gov/pz/portal.html</a>                     |
| FAB        | Csa          | Cucumis sativus                 | cucumber             | Eudicotyledons (Rosids – Fabids - Cucurbitales) | JGI v1                      | Phytozome 10 | JGI v1.0           | <a href="https://phytozome.jgi.doe.gov/pz/portal.html">https://phytozome.jgi.doe.gov/pz/portal.html</a>                     |
| MAL        | Egr          | Eucalyptus grandis              | rose gum             | Eudicotyledons (Rosids – Malvids – Myrtales)    | JGI v1                      | Phytozome 10 | JGI v1.1           | <a href="https://phytozome.jgi.doe.gov/pz/portal.html">https://phytozome.jgi.doe.gov/pz/portal.html</a>                     |
| BRA        | Esa          | Eutrema salsugineum             | salt cress           | Eudicotyledons (Rosids – Malvids – Brassicales) | JGI v1                      | Phytozome 10 | JGI v1             | <a href="https://phytozome.jgi.doe.gov/pz/portal.html">https://phytozome.jgi.doe.gov/pz/portal.html</a>                     |
| FAB        | Fve          | Fragaria vesca                  | strawberry           | Eudicotyledons (Rosids – Fabids - Rosales)      | JGI v1                      | Phytozome 10 | JGI v1.1           | <a href="https://phytozome.jgi.doe.gov/pz/portal.html">https://phytozome.jgi.doe.gov/pz/portal.html</a>                     |
| FAB        | Gma          | Glycine max                     | soybean              | Eudicotyledons (Rosids – Fabids - Fabales)      | JGI v2.0                    | Phytozome 10 | Wm82.a2.v1         | <a href="https://phytozome.jgi.doe.gov/pz/portal.html">https://phytozome.jgi.doe.gov/pz/portal.html</a>                     |
| MAL        | Gra          | Gossypium raimondii             | cotton               | Eudicotyledons (Rosids – Malvids - Malvales)    | JGI v2.1                    | Phytozome 10 | JGI v2.0           | <a href="https://phytozome.jgi.doe.gov/pz/portal.html">https://phytozome.jgi.doe.gov/pz/portal.html</a>                     |
| FAB        | Lja          | Lotus japonicus                 | lotus                | Eudicotyledons (Rosids – Fabids - Fabales)      | BGI v1.0                    | KDRI         | JGI v1.0           | <a href="ftp://ftp.kazusa.or.jp/pub/lotus/lotus_r3.0/">ftp://ftp.kazusa.or.jp/pub/lotus/lotus_r3.0/</a>                     |
| FAB        | Mdo          | Malus domestica                 | apple                | Eudicotyledons (Rosids – Fabids - Rosales)      | JGI v1                      | Phytozome 10 | JGI v1.0           | <a href="https://phytozome.jgi.doe.gov/pz/portal.html">https://phytozome.jgi.doe.gov/pz/portal.html</a>                     |
| FAB        | Mes          | Manihot esculenta               | cassava              | Eudicotyledons (Rosids – Fabids - Malpighiales) | JGI v6                      | Phytozome 11 | JGI v6.1           | <a href="https://phytozome.jgi.doe.gov/pz/portal.html">https://phytozome.jgi.doe.gov/pz/portal.html</a>                     |
| FAB        | Mtr          | Medicago truncatula             | barrel medic         | Eudicotyledons (Rosids – Fabids - Fabales)      | M4.0                        | Phytozome 10 | M4.0v1             | <a href="https://phytozome.jgi.doe.gov/pz/portal.html">https://phytozome.jgi.doe.gov/pz/portal.html</a>                     |
| AST        | Mgu          | Mimulus guttatus                | monkey flower        | Eudicotyledons (Asterids - Lamiales)            | JGI v2.0                    | Phytozome 10 | JGI v2.0           | <a href="https://phytozome.jgi.doe.gov/pz/portal.html">https://phytozome.jgi.doe.gov/pz/portal.html</a>                     |
| MON        | Osa          | Oryza sativa                    | rice                 | Liliopsida/Monocotyledons (Poales)              | Rice Genome Annotation v7.0 | RGAP         | v7.0               | <a href="http://rice.plantbiology.msu.edu/">http://rice.plantbiology.msu.edu/</a>                                           |
| FAB        | Pvu          | Phaseolus vulgaris              | common bean          | Eudicotyledons (Rosids – Fabids - Fabales)      | JGI v1.0                    | Phytozome 11 | JGI v1.0           | <a href="https://phytozome.jgi.doe.gov/pz/portal.html">https://phytozome.jgi.doe.gov/pz/portal.html</a>                     |
| FAB        | Ptr          | Populus trichocarpa             | poplar               | Eudicotyledons (Rosids – Fabids - Malpighiales) | JGI v3.0                    | Phytozome 11 | JGI v3.0           | <a href="https://phytozome.jgi.doe.gov/pz/portal.html">https://phytozome.jgi.doe.gov/pz/portal.html</a>                     |
| FAB        | Ppe          | Prunus persica                  | peach                | Eudicotyledons (Rosids – Fabids - Rosales)      | JGI v1.0                    | Ensembl      | JGI v1.0           | <a href="https://plants.ensembl.org/info/website/ftp/index.html">https://plants.ensembl.org/info/website/ftp/index.html</a> |
| FAB        | Rco          | Ricinus communis                | castor bean          | Eudicotyledons (Rosids – Fabids - Malpighiales) | TIGR.0.1                    | Phytozome 11 | JGI v0.1           | <a href="https://phytozome.jgi.doe.gov/pz/portal.html">https://phytozome.jgi.doe.gov/pz/portal.html</a>                     |
| FAB        | Spu          | Salix purpurea                  | shrub willow         | Eudicotyledons (Rosids – Fabids - Malpighiales) | JGI v1.0                    | Phytozome 11 | JGI v1.0           | <a href="https://phytozome.jgi.doe.gov/pz/portal.html">https://phytozome.jgi.doe.gov/pz/portal.html</a>                     |
| AST        | Sly          | Solanum lycopersicum            | tomato               | Eudicotyledons (Asterids - Solanales)           | ITAGv2.40                   | Ensembl      | ITAGv2.40          | <a href="https://plants.ensembl.org/info/website/ftp/index.html">https://plants.ensembl.org/info/website/ftp/index.html</a> |
| AST        | Stu          | Solanum tuberosum               | potato               | Eudicotyledons (Asterids - Solanales)           | JGI v3.0                    | Phytozome 11 | JGI v3.4           | <a href="https://phytozome.jgi.doe.gov/pz/portal.html">https://phytozome.jgi.doe.gov/pz/portal.html</a>                     |
| MAL        | Tca          | Theobroma cacao                 | cocoa                | Eudicotyledons (Rosids – Malvids - Malvales)    | CGD v1.0                    | Ensembl      | CGD v1.0           | <a href="https://plants.ensembl.org/info/website/ftp/index.html">https://plants.ensembl.org/info/website/ftp/index.html</a> |
| EUD        | Vvi          | Vitis vinifera                  | grape                | Eudicotyledons (Rosids - Vitales)               | Genoscope 12x               | Ensembl      | Genoscope 12x      | <a href="https://plants.ensembl.org/info/website/ftp/index.html">https://plants.ensembl.org/info/website/ftp/index.html</a> |
