# Supplementary material for: Novel pipeline identifies new upstream ORFs and non-AUG initiating main ORFs with conserved amino acid sequences in the 5′ leader of mRNAs in Arabidopsis thaliana
Source: PubMed Central journal article supplement — RNA. 2019 Mar;25(3):292–304. doi: 10.1261/rna.067983.118 (PMC6380273; doi:10.1261/rna.067983.118), 2019-03
Supplement: supp_067983.118_Supplemental_Table_S3.pdf [file supp_067983.118_Supplemental_Table_S3.pdf]

Table S2: Identification of previously discovered CPuORFs

| Homology group | Search Method | uORF         | mORF      | blastp | mORF homology | CDS annotation | Malvids | Purifying selection | >10 species |
|----------------|---------------|--------------|-----------|--------|---------------|----------------|---------|---------------------|-------------|
| 1              | ATH-OSA       | CPuORF1      | AT2G18160 | ✓      | ✓             | ✓              | ✓       | ✓                   | ✓           |
| 1              | ATH-OSA       | CPuORF2      | AT4G34590 | ✓      | ✓             | ✓              | ✓       | ✓                   | ✓           |
| 1              | ATH-OSA       | CPuORF3      | AT3G62420 | ✓      | ✓             | ✓              | ✓       | ✓                   | ✓           |
| 1              | ATH-OSA       | CPuORF4      | AT5G49450 | ✓      | ✓             | ✓              | ✓       | ✓                   | ✓           |
| 1              | ATH-OSA       | CPuORF5      | AT1G75390 | ✓      | ✓             | ✓              | ✓       | ✓                   | ✓           |
| 2              | ATH-OSA       | CPuORF6      | AT2G27230 | ✓      | ✓             | ✓              | ✓       | ✓                   | ✓           |
| 2              | ATH-OSA       | CPuORF7      | AT2G31280 | ✓      | ✓             | X              | -       | -                   | -           |
| 2              | ATH-OSA       | CPuORF8      | AT1G06150 | ✓      | ✓             | ✓              | ✓       | ✓                   | ✓           |
| 3              | ATH-OSA       | CPuORF9      | AT3G02470 | ✓      | ✓             | ✓              | ✓       | ✓                   | ✓           |
| 3              | ATH-OSA       | CPuORF10     | AT5G15950 | ✓      | ✓             | ✓              | ✓       | ✓                   | ✓           |
| 3              | ATH-OSA       | CPuORF11     | AT3G25570 | ✓      | ✓             | ✓              | ✓       | ✓                   | ✓           |
| 4              | ATH-OSA       | CPuORF12     | AT4G25670 | ✓      | ✓             | ✓              | ✓       | ✓                   | ✓           |
| 4              | ATH-OSA       | CPuORF13     | AT4G25690 | ✓      | ✓             | ✓              | ✓       | ✓                   | ✓           |
| 4              | ATH-OSA       | CPuORF14     | AT5G52550 | ✓      | ✓             | ✓              | ✓       | ✓                   | ✓           |
| 5              | ATH-OSA       | CPuORF15     | AT5G61230 | ✓      | ✓             | ✓              | ✓       | ✓                   | ✓           |
| 5              | ATH-OSA       | CPuORF16     | AT5G07840 | ✓      | ✓             | ✓              | ✓       | ✓                   | ✓           |
| 6              | ATH-OSA       | CPuORF17     | AT2G43020 | ✓      | ✓             | ✓              | ✓       | ✓                   | ✓           |
| 6              | ATH-OSA       | CPuORF18     | AT3G59050 | ✓      | ✓             | ✓              | ✓       | ✓                   | ✓           |
| 7              | ATH-OSA       | CPuORF19     | AT1G36730 | ✓      | ✓             | ✓              | ✓       | ✓                   | ✓           |
| 8              | ATH-OSA       | CPuORF20     | AT3G12010 | ✓      | ✓             | ✓              | ✓       | X                   | -           |
| 9              | ATH-OSA       | CPuORF21     | AT5G09670 | ✓      | ✓             | ✓              | ✓       | ✓                   | ✓           |
| 9              | ATH-OSA       | CPuORF22     | AT5G64550 | ✓      | ✓             | ✓              | ✓       | ✓                   | ✓           |
| 9              | ATH-OSA       | CPuORF23     | AT1G64140 | ✓      | ✓             | ✓              | ✓       | ✓                   | ✓           |
| 10             | ATH-OSA       | CPuORF24     | AT5G45430 | ✓      | ✓             | ✓              | ✓       | ✓                   | ✓           |
| 10             | ATH-OSA       | CPuORF25     | AT4G19110 | ✓      | ✓             | ✓              | ✓       | ✓                   | ✓           |
| 11             | ATH-OSA       | CPuORF26     | AT4G12430 | ✓      | ✓             | ✓              | ✓       | ✓                   | ✓           |
| 11             | ATH-OSA       | CPuORF27     | AT4G22590 | ✓      | ✓             | ✓              | ✓       | ✓                   | ✓           |
| 12             | ATH-OSA       | CPuORF28     | AT1G70780 | ✓      | ✓             | ✓              | ✓       | ✓                   | ✓           |
| 12             | ATH-OSA       | CPuORF29     | AT1G23150 | ✓      | ✓             | ✓              | ✓       | ✓                   | ✓           |
| 13             | ATH-OSA       | CPuORF30     | AT3G18000 | ✓      | ✓             | ✓              | ✓       | ✓                   | ✓           |
| 13             | ATH-OSA       | CPuORF31     | AT1G48600 | ✓      | ✓             | ✓              | ✓       | ✓                   | ✓           |
| 13             | ATH-OSA       | CPuORF32     | AT1G73600 | ✓      | ✓             | ✓              | X       | -                   | -           |
| 14             | ATH-OSA       | CPuORF33     | AT3G01470 | ✓      | ✓             | ✓              | ✓       | ✓                   | ✓           |
| 15             | ATH-OSA       | CPuORF34     | AT1G29950 | ✓      | ✓             | ✓              | ✓       | ✓                   | ✓           |
| 15             | ATH-OSA       | CPuORF35     | AT1G29950 | ✓      | ✓             | ✓              | ✓       | ✓                   | ✓           |
| 15             | ATH-OSA       | CPuORF36     | AT5G50010 | ✓      | ✓             | ✓              | ✓       | ✓                   | ✓           |
| 15             | ATH-OSA       | CPuORF37     | AT5G50010 | ✓      | ✓             | ✓              | ✓       | ✓                   | ✓           |
| 15             | ATH-OSA       | CPuORF38     | AT5G64340 | ✓      | ✓             | ✓              | ✓       | ✓                   | ✓           |
| 15             | ATH-OSA       | CPuORF39     | AT5G64340 | ✓      | ✓             | ✓              | ✓       | ✓                   | ✓           |
| 15             | ATH-OSA       | CPuORF40     | AT5G64340 | ✓      | ✓             | ✓              | ✓       | ✓                   | ✓           |
| 15             | ATH-OSA       | CPuORF41     | AT5G09460 | ✓      | ✓             | ✓              | ✓       | ✓                   | ✓           |
| 15             | ATH-OSA       | CPuORF42     | AT5G09460 | ✓      | ✓             | ✓              | ✓       | ✓                   | ✓           |
| 15             | ATH-OSA       | CPuORF43     | AT5G09460 | ✓      | ✓             | ✓              | ✓       | ✓                   | ✓           |
| 16             | ATH-OSA       | CPuORF44     | AT3G51630 | ✓      | ✓             | ✓              | ✓       | ✓                   | ✓           |
| 17             | ATH-OSA       | CPuORF45     | AT1G58120 | ✓      | ✓             | ✓              | ✓       | ✓                   | ✓           |
| 17             | ATH-OSA       | CPuORF46     | AT3G53400 | ✓      | ✓             | ✓              | ✓       | ✓                   | ✓           |
| 17             | ATH-OSA       | CPuORF47     | AT5G03190 | ✓      | ✓             | X              | -       | -                   | -           |
| 17             | ATH-OSA       | CPuORF48     | AT5G01710 | ✓      | ✓             | ✓              | ✓       | ✓                   | ✓           |
| 18             | ATH-OSA       | CPuORF49     | AT4G36990 | ✓      | ✓             | ✓              | ✓       | ✓                   | ✓           |
| 19             | ATH-OSA       | CPuORF50     | AT5G53590 | ✓      | ✓             | ✓              | ✓       | ✓                   | ✓           |
| 20             | ATH-ATH       | CPuORF51     | AT3G53670 | ✓      | ✓             | ✓              | ✓       | ✓                   | ✓           |
| 20             | ATH-ATH       | CPuORF52     | AT2G37480 | ✓      | ✓             | ✓              | ✓       | X                   | -           |
| 21             | ATH-ATH       | CPuORF53     | AT1G68550 | ✓      | ✓             | ✓              | ✓       | X                   | -           |
| 21             | ATH-ATH       | CPuORF54     | AT1G25470 | ✓      | ✓             | ✓              | ✓       | X                   | -           |
| 22             | ATH-ATH       | CPuORF55     | AT1G16860 | ✓      | ✓             | ✓              | X       | -                   | -           |
| 22             | ATH-ATH       | CPuORF56     | AT1G78880 | ✓      | ✓             | ✓              | ✓       | ✓                   | X           |
| 23             | ATH-ATH       | CPuORF57     | AT1G64630 | ✓      | ✓             | ✓              | ✓       | ✓                   | ✓           |
| 23             | ATH-ATH       | CPuORF58     | AT5G41990 | ✓      | ✓             | ✓              | ✓       | X                   | -           |
| 24             | ATH-ATH       | CPuORF59     | AT3G22970 | ✓      | ✓             | ✓              | ✓       | ✓                   | ✓           |
| 24             | ATH-ATH       | CPuORF60     | AT4G14620 | ✓      | ✓             | ✓              | ✓       | ✓                   | ✓           |
| 25             | ATH-ATH       | CPuORF61     | AT3G45240 | ✓      | ✓             | ✓              | ✓       | ✓                   | ✓           |
| 25             | ATH-ATH       | CPuORF62     | AT5G60550 | ✓      | ✓             | ✓              | ✓       | ✓                   | ✓           |
| 26             | ATH-ATH       | CPuORF63     | AT3G10910 | ✓      | ✓             | ✓              | ✓       | ✓                   | X           |
| 26             | ATH-ATH       | CPuORF64     | AT5G05280 | ✓      | ✓             | X              | -       | -                   | -           |
|                | BAIUCAS       | Takahashi_1  | AT1G30270 | ✓      | ✓             | ✓              | ✓       | ✓                   | ✓           |
|                | BAIUCAS       | Takahashi_2  | AT1G67480 | ✓      | ✓             | ✓              | ✓       | ✓                   | ✓           |
|                | BAIUCAS       | Takahashi_3  | AT2G11890 | ✓      | ✓             | ✓              | ✓       | ✓                   | ✓           |
|                | BAIUCAS       | Takahashi_4  | AT2G22500 | ✓      | ✓             | ✓              | ✓       | ✓                   | ✓           |
|                | BAIUCAS       | Takahashi_5  | AT2G42880 | ✓      | ✓             | ✓              | ✓       | ✓                   | ✓           |
|                | BAIUCAS       | Takahashi_6  | AT3G15430 | ✓      | ✓             | ✓              | ✓       | ✓                   | ✓           |
|                | BAIUCAS       | Takahashi_7  | AT4G10170 | ✓      | ✓             | ✓              | ✓       | ✓                   | ✓           |
|                | BAIUCAS       | Takahashi_8  | AT4G12790 | ✓      | ✓             | ✓              | ✓       | ✓                   | ✓           |
|                | BAIUCAS       | Takahashi_9  | AT4G30960 | ✓      | ✓             | ✓              | ✓       | ✓                   | ✓           |
|                | BAIUCAS       | Takahashi_10 | AT5G02480 | ✓      | ✓             | ✓              | ✓       | ✓                   | X           |
|                | BAIUCAS       | Takahashi_11 | AT5G09330 | ✓      | ✓             | ✓              | ✓       | ✓                   | ✓           |
|                | BAIUCAS       | Takahashi_12 | AT5G46590 | ✓      | ✓             | ✓              | ✓       | ✓                   | ✓           |
|                | BAIUCAS       | Takahashi_13 | AT5G64060 | ✓      | ✓             | ✓              | ✓       | ✓                   | ✓           |
|                | BAIUCAS       | Takahashi_16 | AT2G27350 | ✓      | ✓             | ✓              | ✓       | ✓                   | ✓           |
|                | BAIUCAS       | Takahashi_18 | AT3G55050 | ✓      | ✓             | ✓              | ✓       | ✓                   | ✓           |
|                | BAIUCAS       | Takahashi_19 | AT5G27920 | ✓      | ✓             | ✓              | ✓       | ✓                   | X           |
|                | BAIUCAS       | Takahashi_20 | AT5G60450 | ✓      | ✓             | ✓              | ✓       | ✓                   | ✓           |
|                | BAIUCAS       | Takahashi_21 | AT5G63640 | ✓      | ✓             | ✓              | ✓       | ✓                   | ✓           |
|                | MOTIF search  | Vaughn_1     | AT2G11890 | ✓      | ✓             | ✓              | ✓       | ✓                   | ✓           |
|                | MOTIF search  | Vaughn_2     | AT2G22500 | ✓      | ✓             | ✓              | ✓       | ✓                   | ✓           |
|                | MOTIF search  | Vaughn_3     | AT1G67480 | ✓      | ✓             | ✓              | ✓       | ✓                   | ✓           |
|                | MOTIF search  | Vaughn_4     | AT4G30960 | ✓      | ✓             | ✓              | ✓       | ✓                   | ✓           |
|                | Experimental  | Laing_1      | AT5G55120 | ✓      | ✓             | ✓              | ✓       | ✓                   | ✓           |
|                | Experimental  | Laing_2      | AT4G26850 | ✓      | ✓             | ✓              | ✓       | ✓                   | ✓           |
