# Supplementary material for: Novel pipeline identifies new upstream ORFs and non-AUG initiating main ORFs with conserved amino acid sequences in the 5′ leader of mRNAs in Arabidopsis thaliana
Source: PubMed Central journal article supplement — RNA. 2019 Mar;25(3):292–304. doi: 10.1261/rna.067983.118 (PMC6380273; doi:10.1261/rna.067983.118), 2019-03
Supplement: supp_067983.118_Supplemental_Table_S4.pdf [file supp_067983.118_Supplemental_Table_S4.pdf]

Table S3: Predicted localization of proteins with (pep\_morf) or without (morf) translation initiation from predicted alternative start site

| Sequence                | Predotar ( <a href="https://urgi.versailles.inra.fr/predotar/">https://urgi.versailles.inra.fr/predotar/</a> ) |             |             |      |                               | Prediction | Len          | TargetP ( <a href="http://www.cbs.dtu.dk/services/TargetP/">http://www.cbs.dtu.dk/services/TargetP/</a> ) |              |       |   | Loc | RC             | <a href="http://ipsort.hgc.jp/">http://ipsort.hgc.jp/</a><br>iPSORT |
|-------------------------|----------------------------------------------------------------------------------------------------------------|-------------|-------------|------|-------------------------------|------------|--------------|-----------------------------------------------------------------------------------------------------------|--------------|-------|---|-----|----------------|---------------------------------------------------------------------|
|                         | Mito                                                                                                           | Plastid     | ER          | Else | cTP                           |            |              | mTP                                                                                                       | SP           | Other |   |     |                |                                                                     |
| AT1G01670.1_9_morf      | 0,01                                                                                                           | 0,00        | 0,00        | 0,99 | none                          | 365        | 0,191        | 0,071                                                                                                     | 0,148        | 0,842 | _ | 2   | -              |                                                                     |
| AT1G01670.1_9_pep_morf  | 0,01                                                                                                           | 0,00        | 0,04        | 0,95 | none                          | 409        | 0,068        | 0,277                                                                                                     | 0,072        | 0,803 | _ | 3   | -              |                                                                     |
| AT1G03260.1_12_morf     | 0,03                                                                                                           | 0,01        | <b>0,52</b> | 0,46 | <b>ER</b>                     | 274        | 0,001        | 0,018                                                                                                     | <b>0,968</b> | 0,151 | S | 1   | Signal peptide |                                                                     |
| AT1G03260.1_12_pep_morf | <b>0,43</b>                                                                                                    | 0,00        | 0,00        | 0,57 | <b>possibly mitochondrial</b> | 320        | 0,051        | <b>0,312</b>                                                                                              | 0,003        | 0,692 | _ | 4   |                |                                                                     |
| AT1G16780.1_13_morf     | 0,01                                                                                                           | 0,01        | 0,00        | 0,99 | none                          | 802        | 0,03         | 0,126                                                                                                     | 0,007        | 0,963 | _ | 1   |                |                                                                     |
| AT1G16780.1_13_pep_morf | 0,01                                                                                                           | 0,00        | 0,05        | 0,94 | none                          | 832        | 0,178        | <b>0,319</b>                                                                                              | 0,012        | 0,34  | _ | 5   | Mit/chlor      |                                                                     |
| AT1G55760.1_20_morf     | 0,02                                                                                                           | 0,01        | 0,02        | 0,95 | none                          | 329        | 0,075        | <b>0,559</b>                                                                                              | 0,011        | 0,339 | M | 4   | Mito           |                                                                     |
| AT1G55760.1_20_pep_morf | 0,01                                                                                                           | 0           | 0           | 0,99 | none                          | 356        | 0,084        | <b>0,097</b>                                                                                              | 0,034        | 0,786 | - | 2   | -              |                                                                     |
| AT1G51810.1_11_morf     | 0,01                                                                                                           | 0,07        | 0,00        | 0,93 | none                          | 744        | 0,128        | 0,092                                                                                                     | 0,227        | 0,841 | _ | 2   | Mit/chlor      |                                                                     |
| AT1G51810.1_11_pep_morf | 0,01                                                                                                           | 0,00        | 0,00        | 0,99 | none                          | 845        | 0,079        | 0,078                                                                                                     | 0,116        | 0,945 | _ | 1   |                |                                                                     |
| AT1G78920.1_18_morf     | 0,01                                                                                                           | 0,01        | 0,00        | 0,98 | none                          | 802        | 0,03         | 0,172                                                                                                     | 0,014        | 0,909 | _ | 2   |                |                                                                     |
| AT1G78920.1_18_pep_morf | 0,01                                                                                                           | 0,01        | 0,00        | 0,99 | none                          | 832        | 0,32         | 0,125                                                                                                     | 0,014        | 0,547 | _ | 4   | Mit/chlor      |                                                                     |
| AT2G18040.1_10_morf     | <b>0,23</b>                                                                                                    | 0,03        | 0,00        | 0,75 | <b>possibly mitochondrial</b> | 119        | 0,139        | 0,418                                                                                                     | 0,055        | 0,439 | _ | 5   |                |                                                                     |
| AT2G18040.1_10_pep_morf | 0,01                                                                                                           | 0,00        | 0,00        | 0,99 | none                          | 154        | 0,334        | 0,056                                                                                                     | 0,015        | 0,882 | _ | 3   |                |                                                                     |
| AT2G25110.1_6_morf      | 0,01                                                                                                           | 0,00        | <b>0,99</b> | 0,01 | <b>ER</b>                     | 218        | 0,05         | 0,049                                                                                                     | <b>0,784</b> | 0,199 | S | 3   | Mit/chlor      |                                                                     |
| AT2G25110.1_6_pep_morf  | 0,06                                                                                                           | <b>0,84</b> | 0,00        | 0,15 | <b>plastid</b>                | 278        | <b>0,671</b> | <b>0,483</b>                                                                                              | 0,002        | 0,029 | C | 5   | Mito           |                                                                     |
| AT2G26760.1_11_morf     | 0,01                                                                                                           | 0,00        | 0,00        | 0,99 | none                          | 387        | 0,167        | 0,09                                                                                                      | 0,064        | 0,829 | _ | 2   | Mit            |                                                                     |
| AT2G26760.1_11_pep_morf | 0,01                                                                                                           | 0,00        | 0,01        | 0,98 | none                          | 431        | 0,125        | <b>0,442</b>                                                                                              | 0,021        | 0,342 | M | 5   | Mito           |                                                                     |
| AT2G26890.1_12_morf     | 0,01                                                                                                           | 0,00        | 0,00        | 0,99 | none                          | 2554       | 0,186        | 0,186                                                                                                     | 0,037        | 0,768 | _ | 3   |                |                                                                     |
| AT2G26890.1_12_pep_morf | 0,01                                                                                                           | 0,01        | 0,01        | 0,97 | none                          | 2604       | 0,118        | <b>0,651</b>                                                                                              | 0,027        | 0,334 | M | 4   | Mit/Chlor      |                                                                     |
| AT3G02750.3_13_morf     | 0,01                                                                                                           | <b>0,31</b> | 0,00        | 0,68 | <b>possibly plastid</b>       | 527        | <b>0,924</b> | 0,156                                                                                                     | 0,013        | 0,096 | C | 2   | Mito           |                                                                     |
| AT3G02750.3_13_pep_morf | 0,01                                                                                                           | 0,01        | 0,03        | 0,96 | none                          | 551        | 0,28         | 0,048                                                                                                     | 0,042        | 0,361 | _ | 5   | Signal         |                                                                     |
| AT3G04080.1_15_morf     | 0,07                                                                                                           | 0,00        | 0,05        | 0,88 | none                          | 471        | 0,061        | <b>0,653</b>                                                                                              | 0,032        | 0,455 | M | 5   | Mito           |                                                                     |
| AT3G04080.1_15_pep_morf | 0,01                                                                                                           | 0,01        | 0,00        | 0,98 | none                          | 534        | <b>0,687</b> | 0,109                                                                                                     | 0,06         | 0,178 | C | 3   | Mit/Chlor      |                                                                     |
| AT3G10985.1_16_morf     | 0,01                                                                                                           | 0,02        | 0,10        | 0,88 | none                          | 110        | 0,094        | 0,132                                                                                                     | 0,162        | 0,251 | _ | 5   | Mito           |                                                                     |
| AT3G10985.1_16_pep_morf | 0,01                                                                                                           | 0,01        | 0,00        | 0,98 | none                          | 158        | 0,07         | 0,14                                                                                                      | 0,011        | 0,717 | _ | 3   |                |                                                                     |
| AT3G16630.2_15_morf     | 0,01                                                                                                           | 0,00        | 0,01        | 0,99 | none                          | 794        | 0,058        | 0,22                                                                                                      | 0,06         | 0,658 | _ | 3   |                |                                                                     |
| AT3G16630.2_15_pep_morf | 0,10                                                                                                           | 0,00        | 0,01        | 0,89 | none                          | 804        | 0,041        | <b>0,761</b>                                                                                              | 0,013        | 0,231 | M | 3   | Mito           |                                                                     |
| AT3G23010.2_13_morf     | 0,03                                                                                                           | 0,00        | 0,01        | 0,96 | none                          | 519        | 0,03         | 0,169                                                                                                     | 0,142        | 0,703 | _ | 3   |                |                                                                     |
| AT3G23010.2_13_pep_morf | 0,03                                                                                                           | 0,00        | 0,03        | 0,94 | none                          | 528        | 0,079        | 0,063                                                                                                     | 0,031        | 0,908 | _ | 1   | Mito           |                                                                     |
| AT3G62660.1_20_morf     | 0,12                                                                                                           | 0,00        | <b>0,98</b> | 0,02 | <b>ER</b>                     | 361        | 0,021        | 0,038                                                                                                     | <b>0,863</b> | 0,011 | S | 1   | Signal         |                                                                     |
| AT3G62660.1_20_pep_morf | 0,07                                                                                                           | 0,00        | 0,02        | 0,91 | none                          | 388        | 0,008        | 0,066                                                                                                     | <b>0,533</b> | 0,514 | S | 5   |                |                                                                     |
| AT4G00840.1_4_morf      | 0,05                                                                                                           | 0,01        | <b>0,98</b> | 0,02 | <b>ER</b>                     | 291        | 0            | 0,265                                                                                                     | <b>0,943</b> | 0,031 | S | 2   | Signal         |                                                                     |
| AT4G00840.1_4_pep_morf  | <b>0,61</b>                                                                                                    | 0,00        | 0,07        | 0,36 | <b>mitochondrial</b>          | 318        | 0,008        | <b>0,779</b>                                                                                              | 0,013        | 0,398 | M | 4   | Mit/Chlor      |                                                                     |
| AT4G02680.1_21_morf     | 0,01                                                                                                           | 0,00        | 0,01        | 0,99 | none                          | 888        | 0,343        | 0,091                                                                                                     | 0,069        | 0,629 | _ | 4   |                |                                                                     |
| AT4G02680.1_21_pep_morf | 0,01                                                                                                           | 0,19        | 0,10        | 0,73 | none                          | 900        | 0,197        | 0,119                                                                                                     | 0,027        | 0,633 | _ | 3   |                |                                                                     |
| AT4G21326.1_32_morf     | 0,01                                                                                                           | 0,03        | 0,00        | 0,96 | none                          | 694        | 0,129        | 0,115                                                                                                     | 0,069        | 0,695 | _ | 3   |                |                                                                     |
| AT4G21326.1_32_pep_morf | 0,01                                                                                                           | 0,00        | 0,00        | 0,99 | none                          | 717        | 0,096        | 0,253                                                                                                     | 0,025        | 0,859 | _ | 2   |                |                                                                     |
| AT5G13330.1_17_morf     | 0,01                                                                                                           | 0,01        | 0,00        | 0,99 | none                          | 212        | 0,093        | 0,088                                                                                                     | 0,043        | 0,91  | _ | 1   |                |                                                                     |
| AT5G13330.1_17_pep_morf | 0,01                                                                                                           | 0,00        | 0,00        | 0,99 | none                          | 243        | 0,036        | 0,24                                                                                                      | 0,101        | 0,899 | _ | 2   |                |                                                                     |
| AT5G14500.1_5_morf      | 0,01                                                                                                           | 0,00        | 0,00        | 0,99 | none                          | 306        | 0,087        | 0,118                                                                                                     | 0,038        | 0,837 | _ | 2   |                |                                                                     |
| AT5G14500.1_5_pep_morf  | 0,20                                                                                                           | 0,00        | 0,03        | 0,78 | none                          | 330        | 0,111        | 0,382                                                                                                     | 0,033        | 0,444 | _ | 5   |                |                                                                     |
| AT5G18260.1_9_morf      | 0,01                                                                                                           | 0,01        | 0,00        | 0,98 | none                          | 320        | <b>0,687</b> | 0,116                                                                                                     | 0,003        | 0,251 | C | 3   |                |                                                                     |
| AT5G18260.1_9_pep_morf  | 0,08                                                                                                           | 0,11        | 0,02        | 0,80 | none                          | 377        | <b>0,38</b>  | <b>0,384</b>                                                                                              | 0,009        | 0,237 | M | 5   | Mit/Chlor      |                                                                     |
| AT5G18280.1_6_morf      | 0,03                                                                                                           | 0,00        | 0,03        | 0,94 | none                          | 472        | 0,112        | <b>0,725</b>                                                                                              | 0,012        | 0,455 | M | 4   | Mito           |                                                                     |
| AT5G18280.1_6_pep_morf  | 0,01                                                                                                           | 0,03        | 0,00        | 0,97 | none                          | 523        | 0,402        | 0,138                                                                                                     | 0,038        | 0,595 | _ | 5   | Mit/Chlor      |                                                                     |
| AT5G36250.1_16_morf     | 0,01                                                                                                           | <b>0,29</b> | 0,00        | 0,70 | <b>possibly plastid</b>       | 448        | <b>0,889</b> | 0,315                                                                                                     | 0,004        | 0,039 | C | 3   | Mito           |                                                                     |
| AT5G36250.1_16_pep_morf | 0,02                                                                                                           | 0,01        | 0,01        | 0,96 | none                          | 486        | 0,227        | 0,067                                                                                                     | 0,006        | 0,667 | _ | 3   |                |                                                                     |
