# Supplementary figures and images for: Novel pipeline identifies new upstream ORFs and non-AUG initiating main ORFs with conserved amino acid sequences in the 5′ leader of mRNAs in Arabidopsis thaliana
Source: PubMed Central journal article supplement — RNA. 2019 Mar;25(3):292–304. doi: 10.1261/rna.067983.118 (PMC6380273; doi:10.1261/rna.067983.118), 2019-03

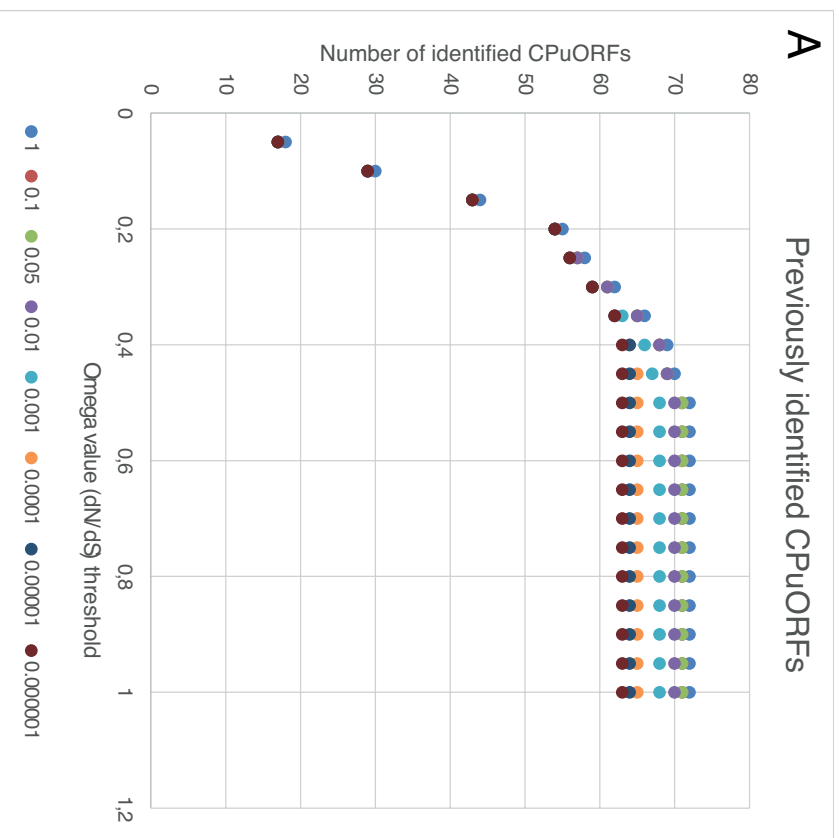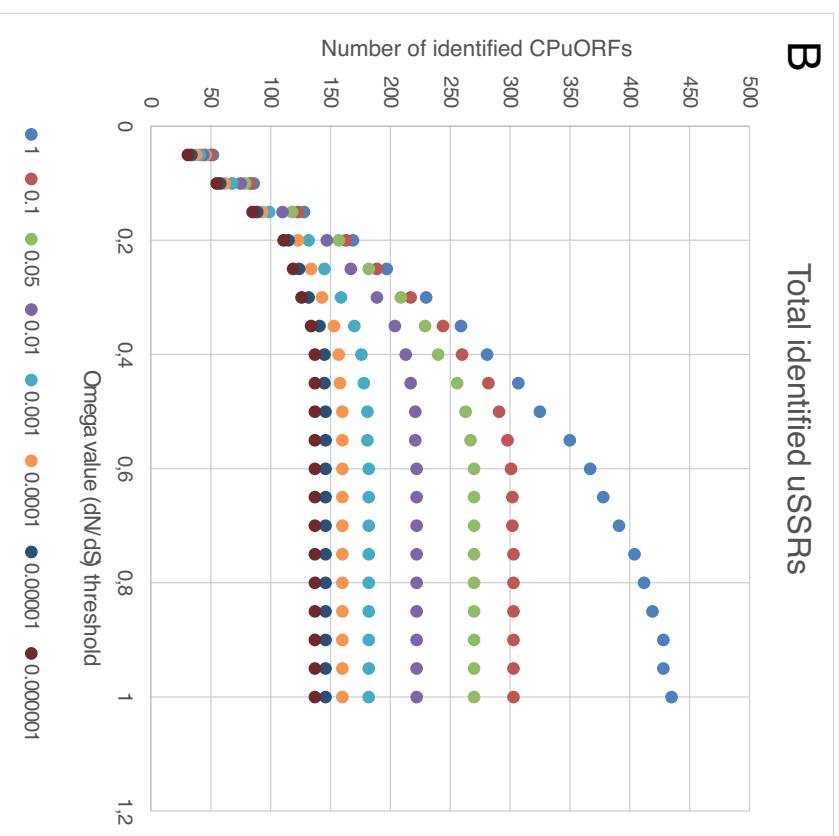

Supplement: supp_067983.118_Supplemental_Figure_S1.pdf [file supp_067983.118_Supplemental_Figure_S1.pdf]

Number of species of which the closest homologue possesses a 5' leader

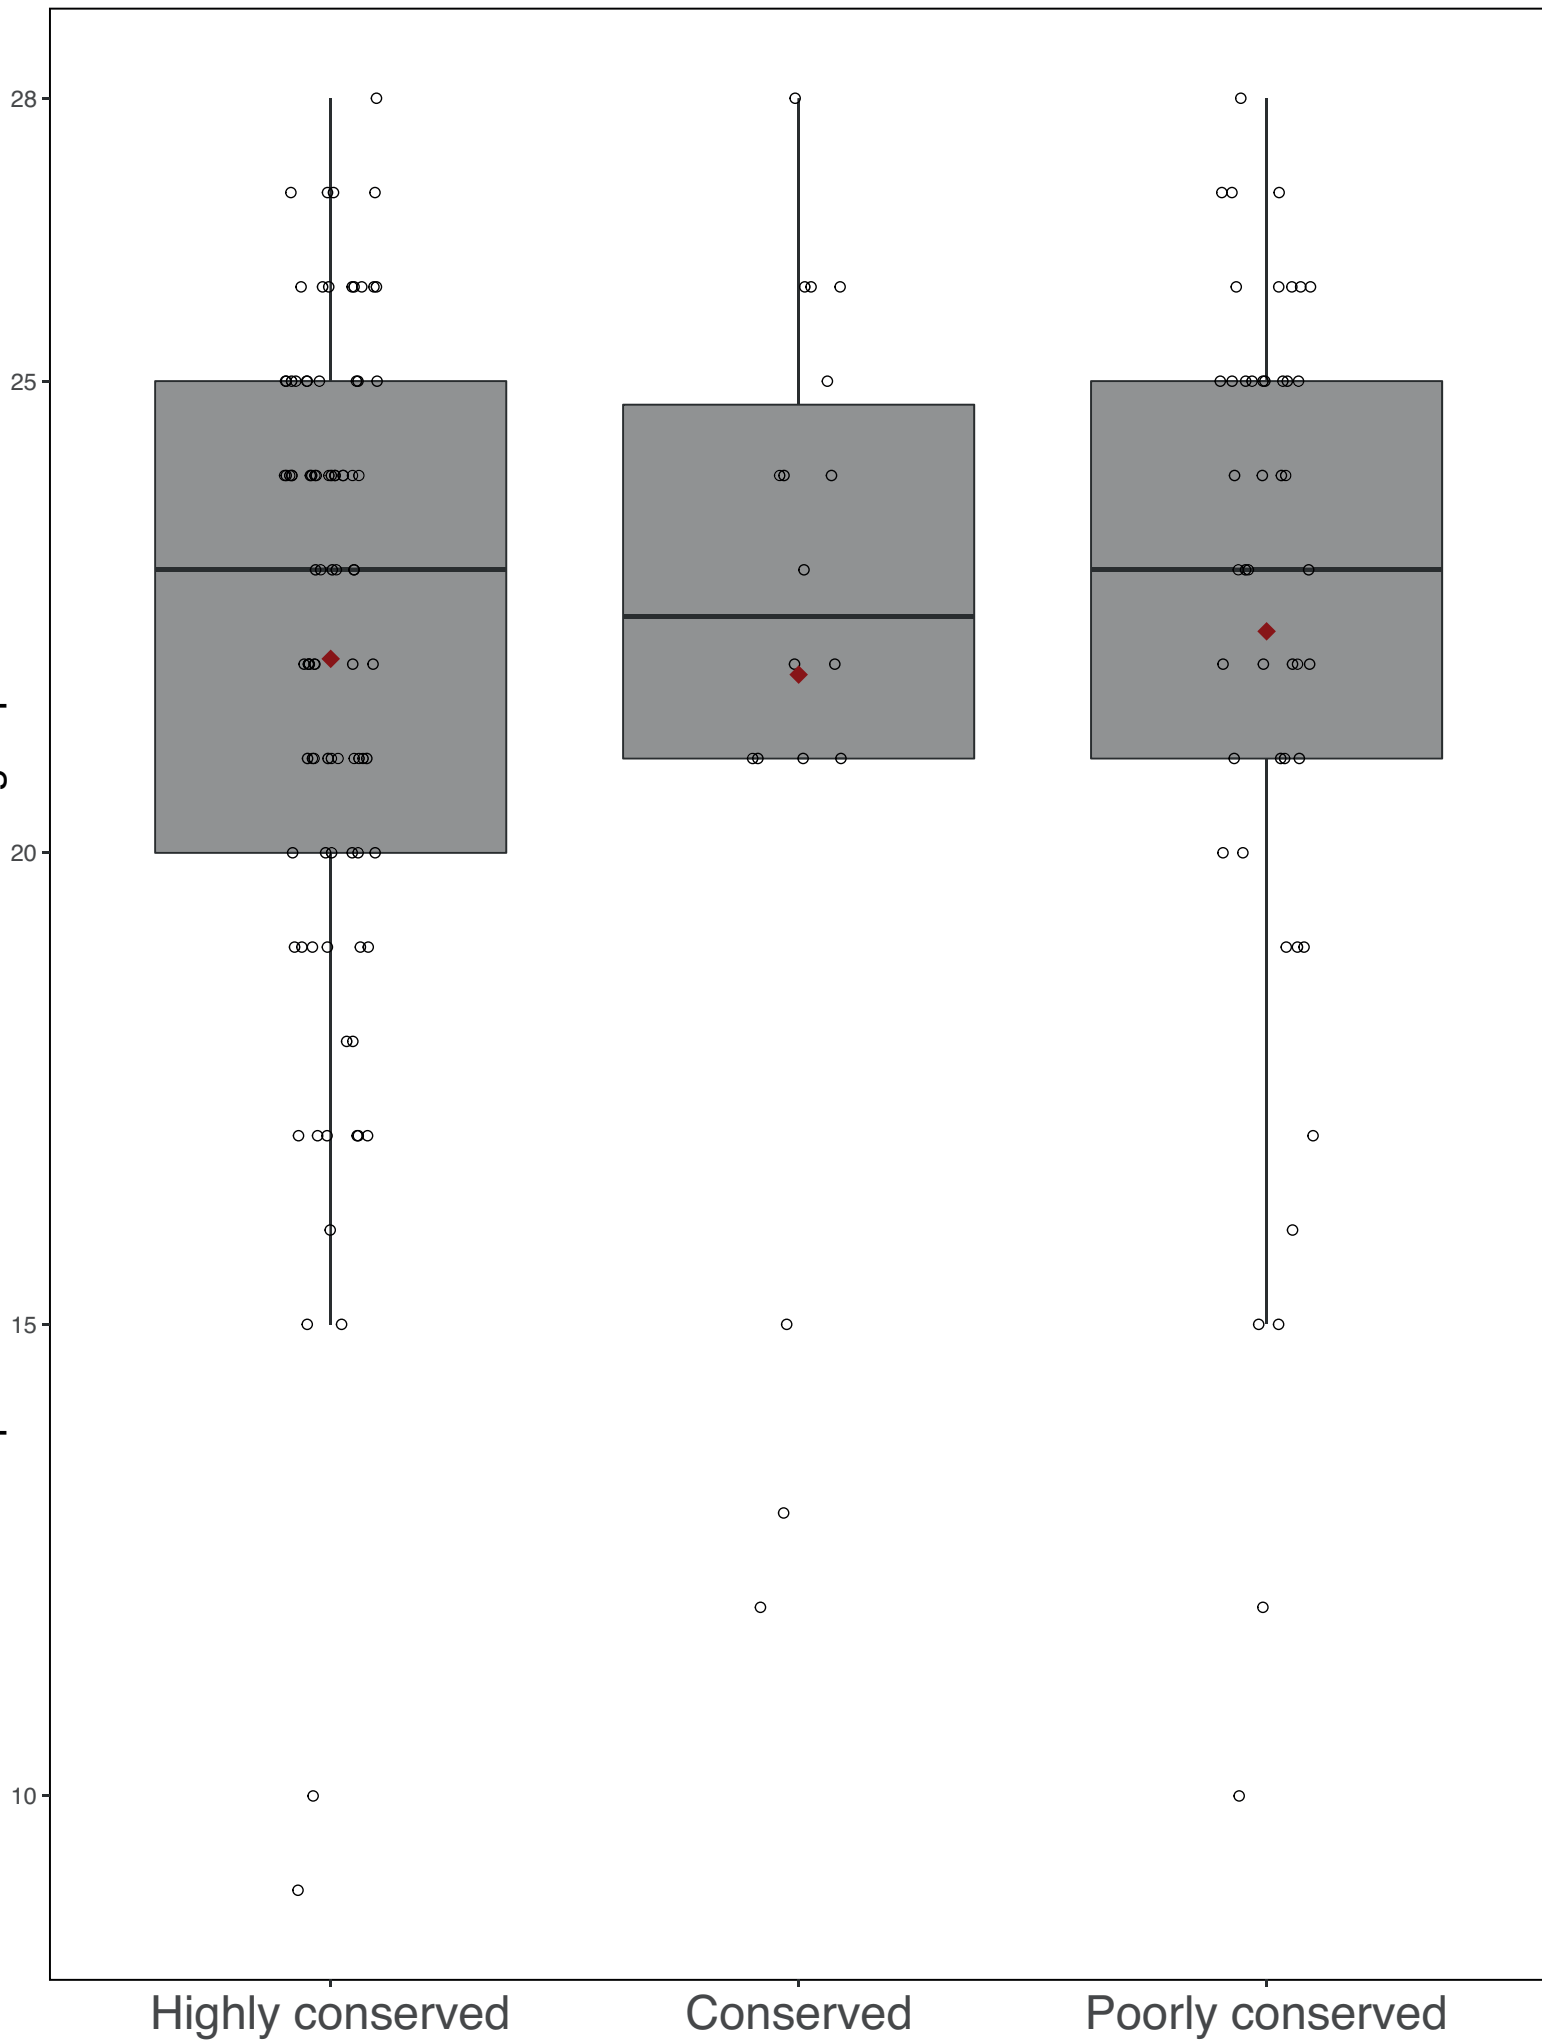

Supplement: supp_067983.118_Supplemental_Figure_S2.pdf [file supp_067983.118_Supplemental_Figure_S2.pdf]

# AT1G01060

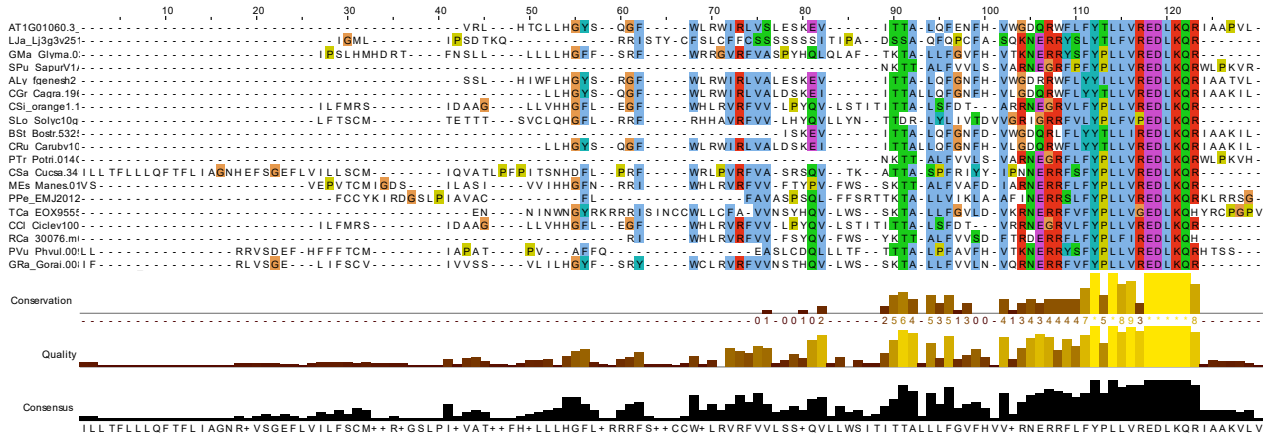

# AT1G11820

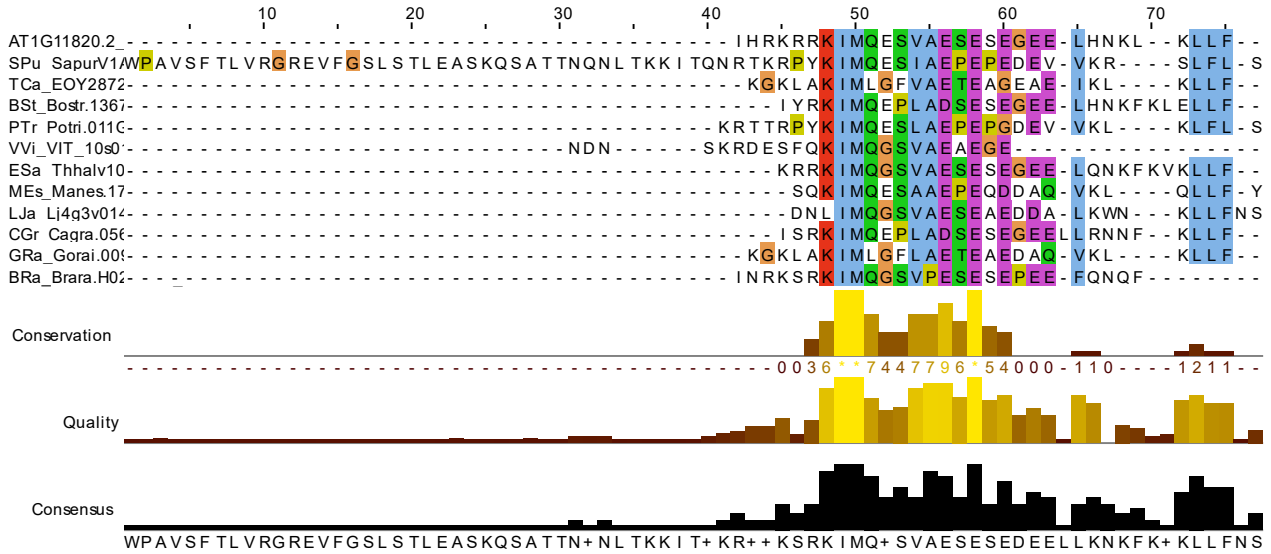

# AT1G57680

Supplement: supp_067983.118_Supplemental_Figure_S5.pdf [file supp_067983.118_Supplemental_Figure_S5.pdf]

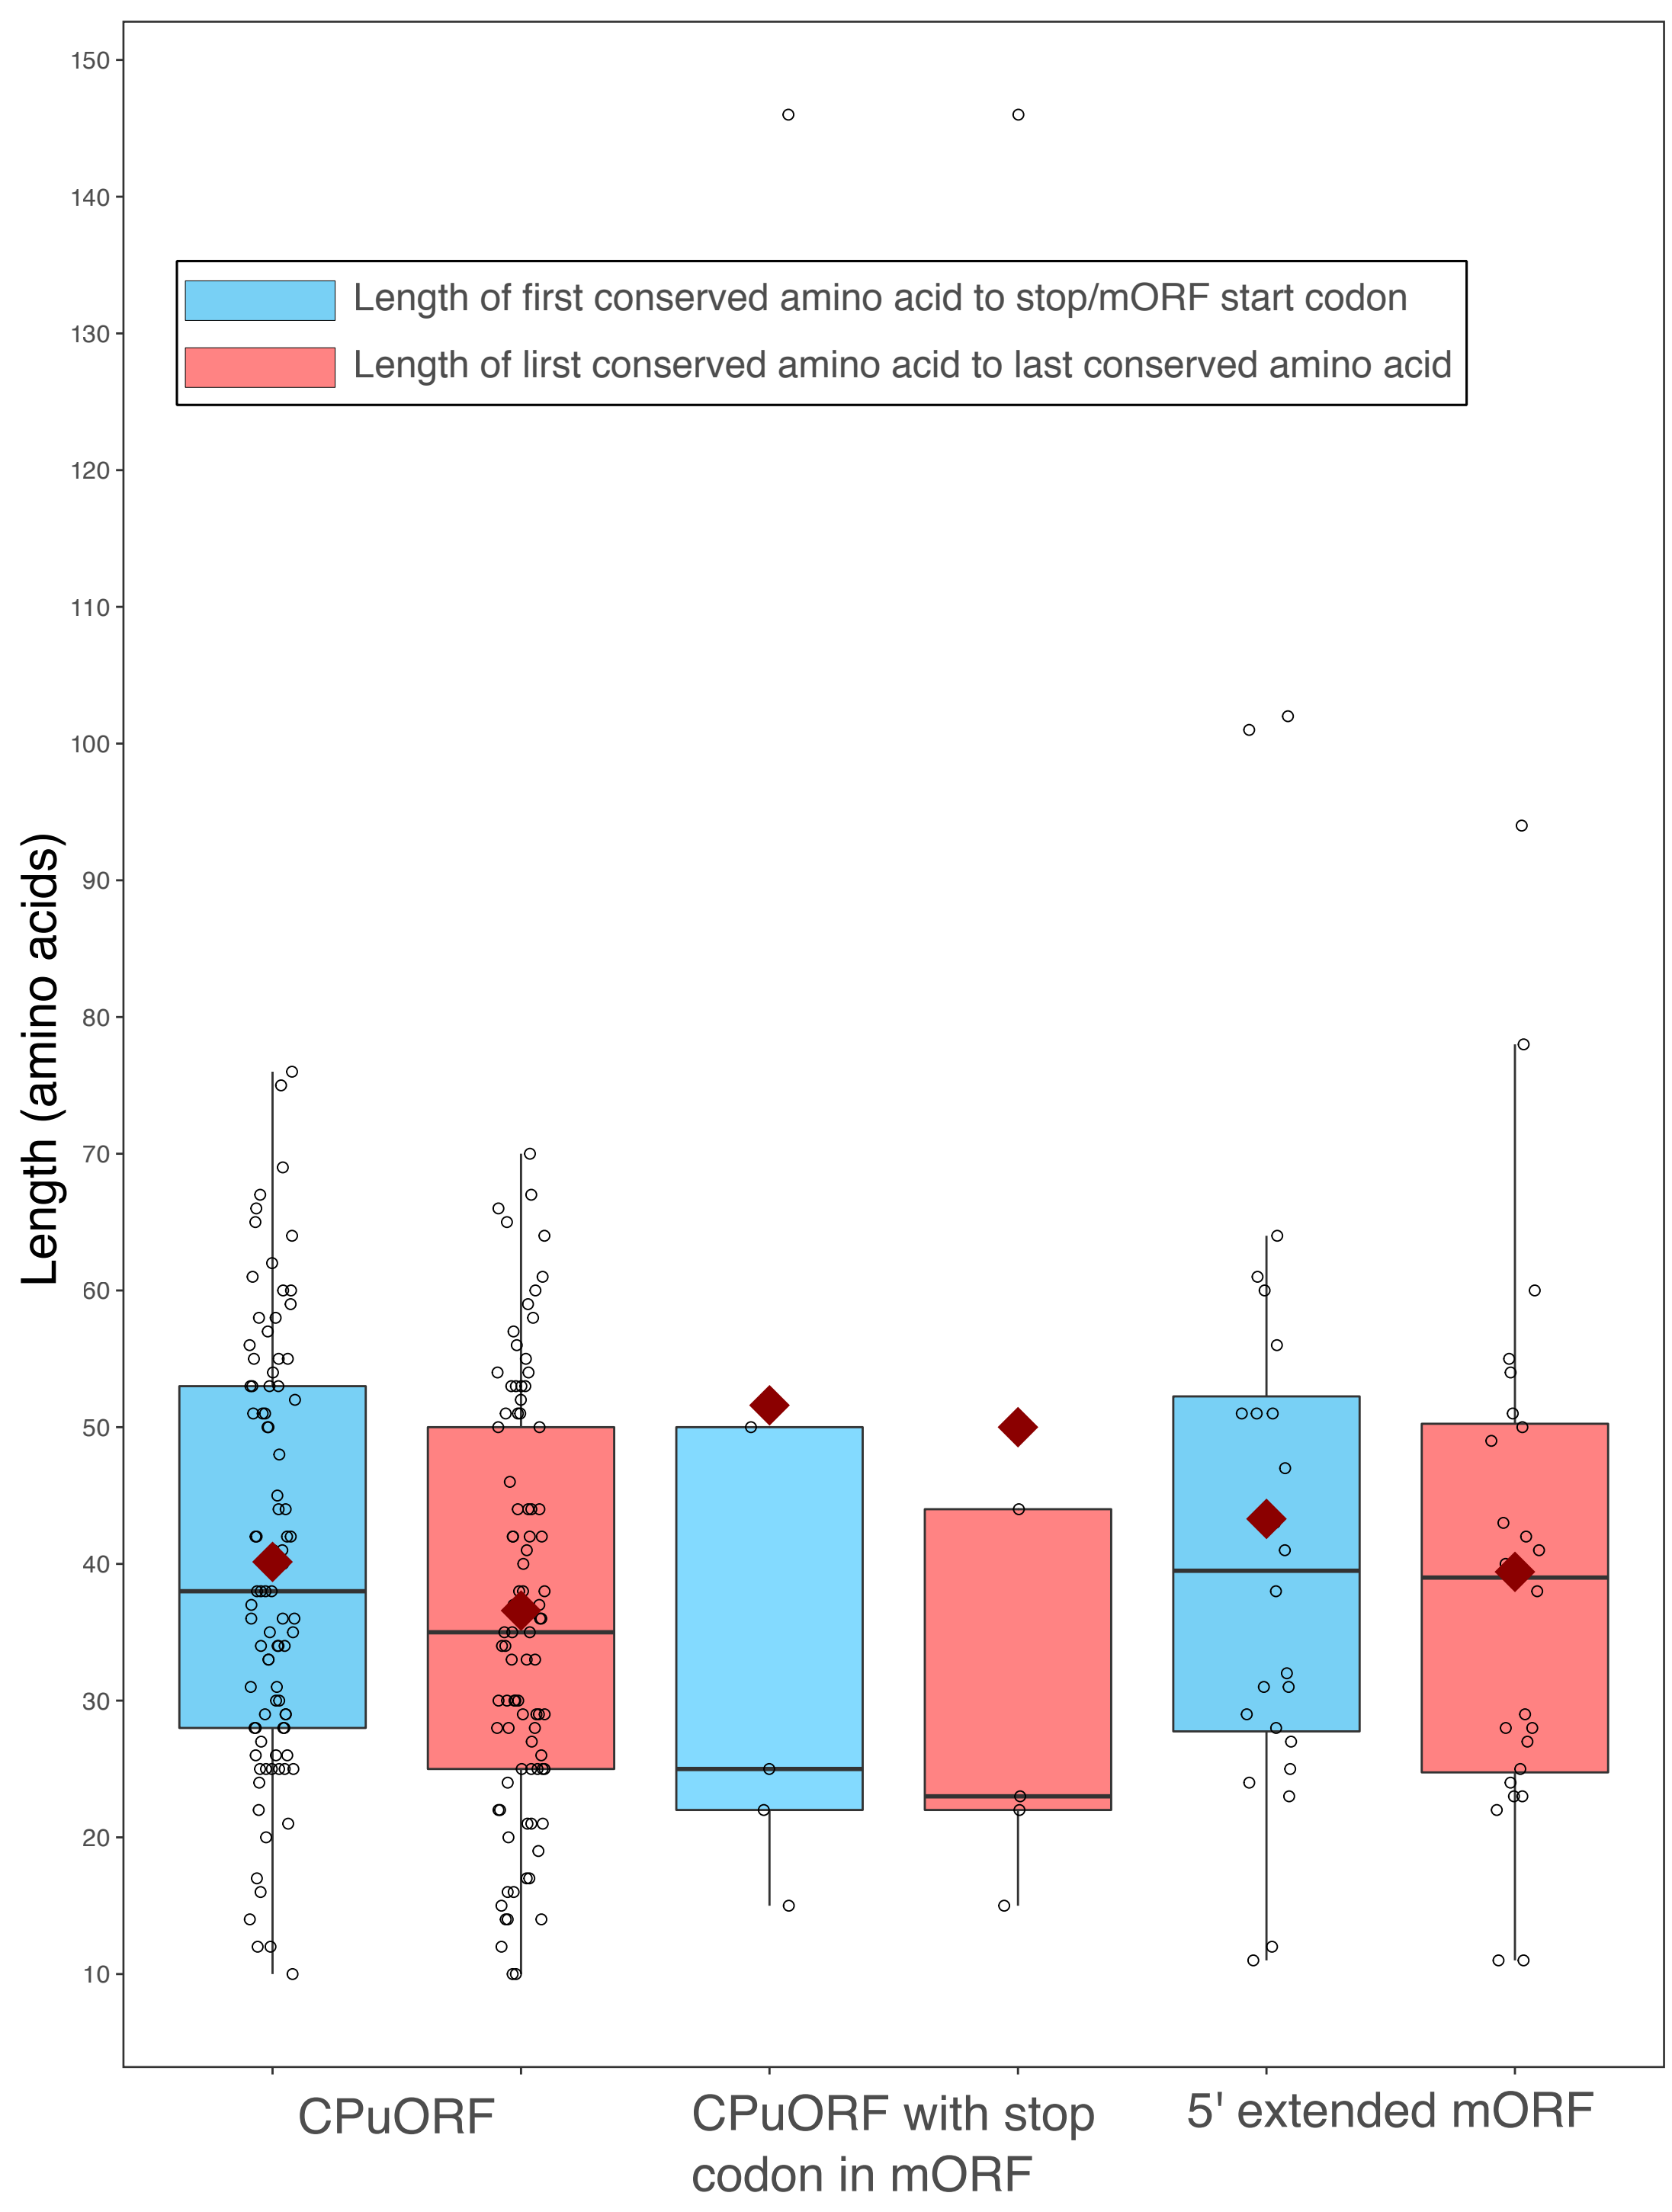

Supplement: supp_067983.118_Supplemental_Figure_S7.pdf [file supp_067983.118_Supplemental_Figure_S7.pdf]

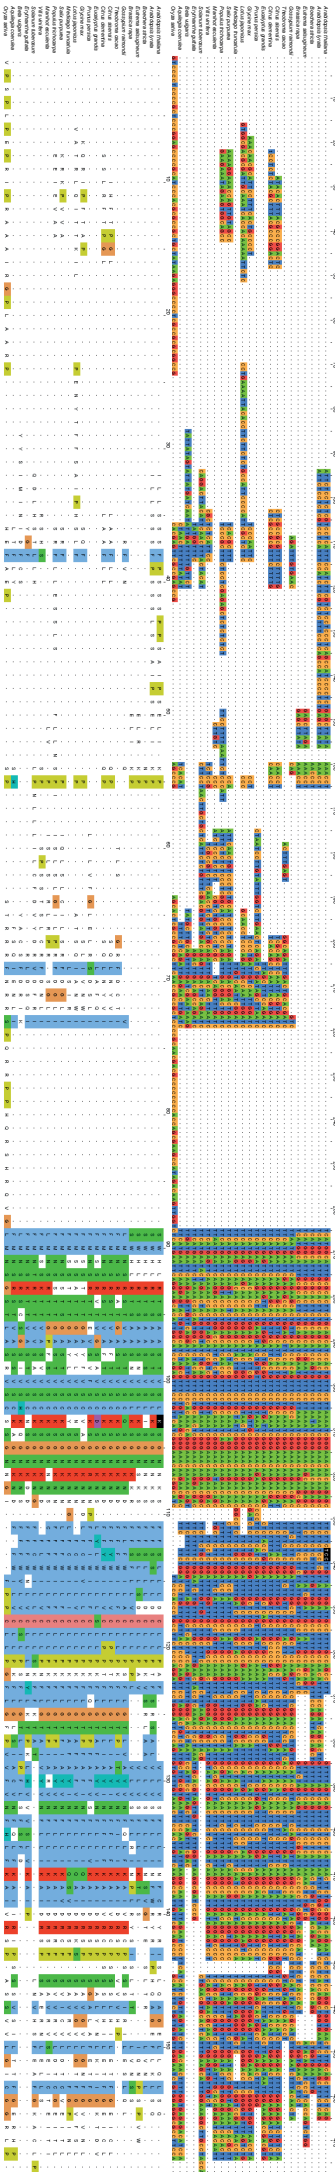

Supplement: supp_067983.118_Supplemental_Figure_S8.pdf [file supp_067983.118_Supplemental_Figure_S8.pdf]
